# Supplementary material for: Loss of p53 activates thyroid hormone via type 2 deiodinase and enhances DNA damage
Source: PubMed Central journal article supplement (PMC9985592; doi:10.1038/s41467-023-36755-y), 2023-03-04

## Supplementary Information

### Loss of p53 activates Thyroid Hormone via type 2 deiodinase and enhances DNA damage

Annarita Nappi<sup>1</sup>, Caterina Miro<sup>1</sup>, Antonio Pezone<sup>2</sup>, Alfonso Tramontano<sup>3</sup>, Emery Di Cicco<sup>1</sup>, Serena Sagliocchi<sup>1</sup>, Annunziata Gaetana Cicatiello<sup>1</sup>, Melania Murolo<sup>1</sup>, Sepehr Torabinejad<sup>1</sup>, Elena Abboto<sup>4</sup>, Giuseppina Caiazzo<sup>1</sup>, Maddalena Raia<sup>5</sup>, Mariano Stornaiuolo<sup>6</sup>, Dario Antonini<sup>2</sup>, Gabriella Fabbrocini<sup>1</sup>, Domenico Salvatore<sup>5,7</sup>, Vittorio Enrico Avvedimento<sup>8</sup> and Monica Dentice<sup>1,5</sup>

<sup>1</sup>Department of Clinical Medicine and Surgery, University of Naples “Federico II”, 80131, Naples, Italy; <sup>2</sup>Department of Biology, University of Naples “Federico II”, 80126, Naples, Italy; <sup>3</sup>Department of Precision Medicine, University of Campania “L. Vanvitelli”, 80138, Naples, Italy; <sup>4</sup>Department of Experimental Medicine, University of Genoa, 16132, Genoa, Italy; <sup>5</sup>CEINGE, Biotecnologie Avanzate S.c.a.r.l., 80131, Naples, Italy; <sup>6</sup>Department of Pharmacy, University of Naples “Federico II”, 80149, Naples, Italy; <sup>7</sup>Department of Public Health, University of Naples “Federico II”, 80131, Naples, Italy; <sup>8</sup>Department of Molecular Medicine and Medical Biotechnology, University of Naples “Federico II”, 80131, Naples, Italy.

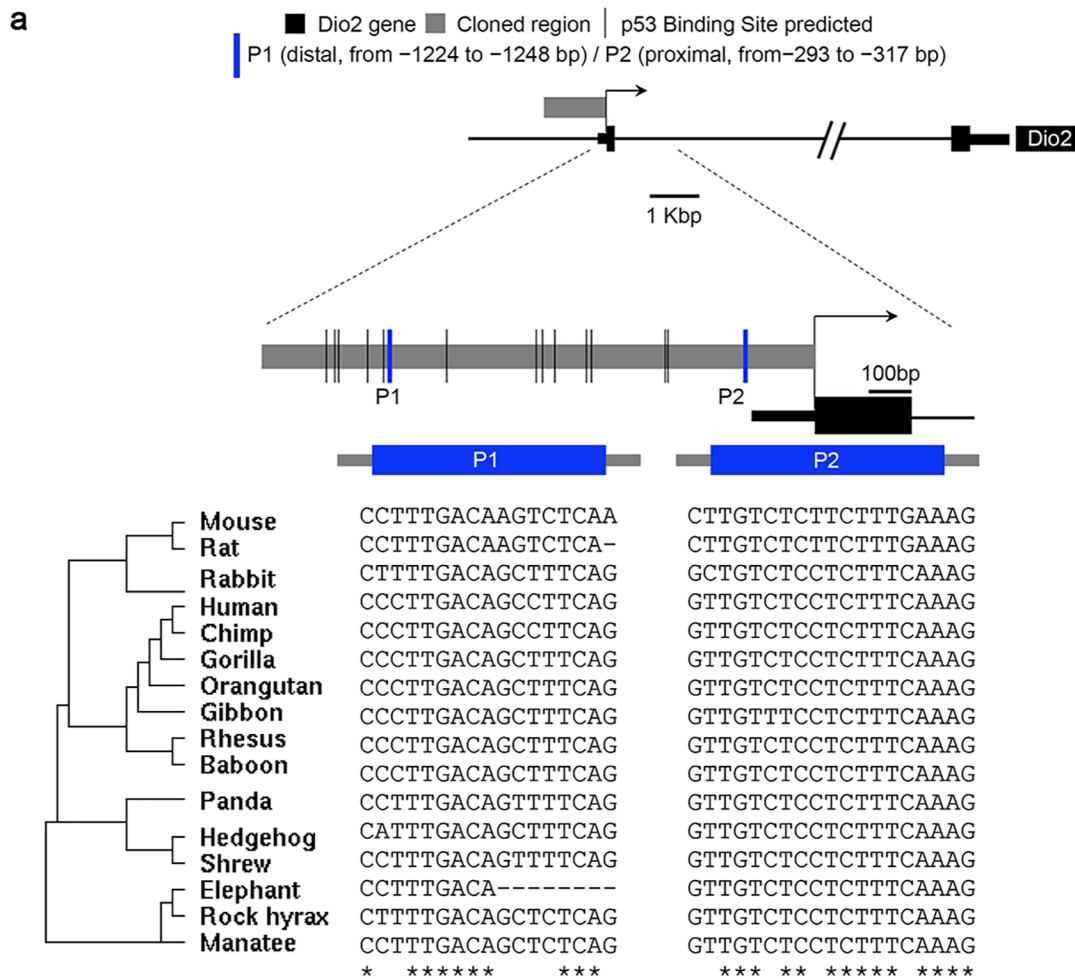

**b**

| AC            | ID               | Score           | Loc.        | Str.       | Consensus Sequence | Signal Sequence    |
|---------------|------------------|-----------------|-------------|------------|--------------------|--------------------|
| M00272        | V\$P53_02        | 0.805686        | 127         | (+)        | NGRCWTGYCY         | ACCCATG TTC        |
| M00272        | V\$P53_02        | 0.843200        | 151         | (+)        | NGRCWTGYCY         | CTACCTGCCT         |
| M00272        | V\$P53_02        | 0.795135        | 155         | (+)        | NGRCWTGYCY         | CTGCCTGCCA         |
| M00272        | V\$P53_02        | 0.805100        | 222         | (-)        | NGRCWTGYCY         | TAACATATTA         |
| M00272        | V\$P53_02        | 0.819754        | 261         | (+)        | NGRCWTGYCY         | AAGCATTTCT         |
| M00272        | V\$P53_02        | 0.842614        | 261         | (-)        | NGRCWTGYCY         | AAGCATTTCT         |
| <b>M00272</b> | <b>V\$P53_02</b> | <b>0.944900</b> | <b>273</b>  | <b>(+)</b> | <b>NGRCWTGYCY</b>  | <b>AGACTTG TCA</b> |
| <b>M00272</b> | <b>V\$P53_02</b> | <b>0.936108</b> | <b>273</b>  | <b>(-)</b> | <b>NGRCWTGYCY</b>  | <b>AGACTTG TCA</b> |
| M00272        | V\$P53_02        | 0.817116        | 406         | (+)        | NGRCWTGYCY         | AAGTAAGCCC         |
| M00272        | V\$P53_02        | 0.800117        | 406         | (-)        | NGRCWTGYCY         | AAGTAAGCCC         |
| M00272        | V\$P53_02        | 0.825029        | 624         | (-)        | NGRCWTGYCY         | GGACAGGCAG         |
| M00272        | V\$P53_02        | 0.814185        | 638         | (+)        | NGRCWTGYCY         | AGACAGGCTG         |
| M00272        | V\$P53_02        | 0.871043        | 638         | (-)        | NGRCWTGYCY         | AGACAGGCTG         |
| M00272        | V\$P53_02        | 0.850821        | 664         | (+)        | NGRCWTGYCY         | AAGTATGTTT         |
| M00272        | V\$P53_02        | 0.805393        | 664         | (-)        | NGRCWTGYCY         | AAGTATGTTT         |
| M00272        | V\$P53_02        | 0.854631        | 739         | (-)        | NGRCWTGYCY         | AAACAAACCA         |
| M00272        | V\$P53_02        | 0.801583        | 748         | (-)        | NGRCWTGYCY         | AAACAACCCC         |
| M00272        | V\$P53_02        | 0.792790        | 929         | (-)        | NGRCWTGYCY         | GGACTGGCAC         |
| M00272        | V\$P53_02        | 0.806565        | 933         | (+)        | NGRCWTGYCY         | TGGCAGCCA          |
| M00272        | V\$P53_02        | 0.883646        | 933         | (-)        | NGRCWTGYCY         | TGGCAGCCA          |
| <b>M00272</b> | <b>V\$P53_02</b> | <b>0.854924</b> | <b>1113</b> | <b>(+)</b> | <b>NGRCWTGYCY</b>  | <b>AGACAAGTTG</b>  |
| <b>M00272</b> | <b>V\$P53_02</b> | <b>0.916471</b> | <b>1113</b> | <b>(-)</b> | <b>NGRCWTGYCY</b>  | <b>AGACAAGTTG</b>  |

**Supplementary Fig. 1 | p53 negatively regulates Type 2 deiodinase expression. a**, Schematic localization of p53 binding site within the *Dio2* promoter region and conservation analysis of the p53 binding motif. **b**, Consensus sequence analysis of the 15 different putative consensus “half-site” motifs for p53 (ID V\$P53\_02, AC M00272) within the *Dio2* promoter region.



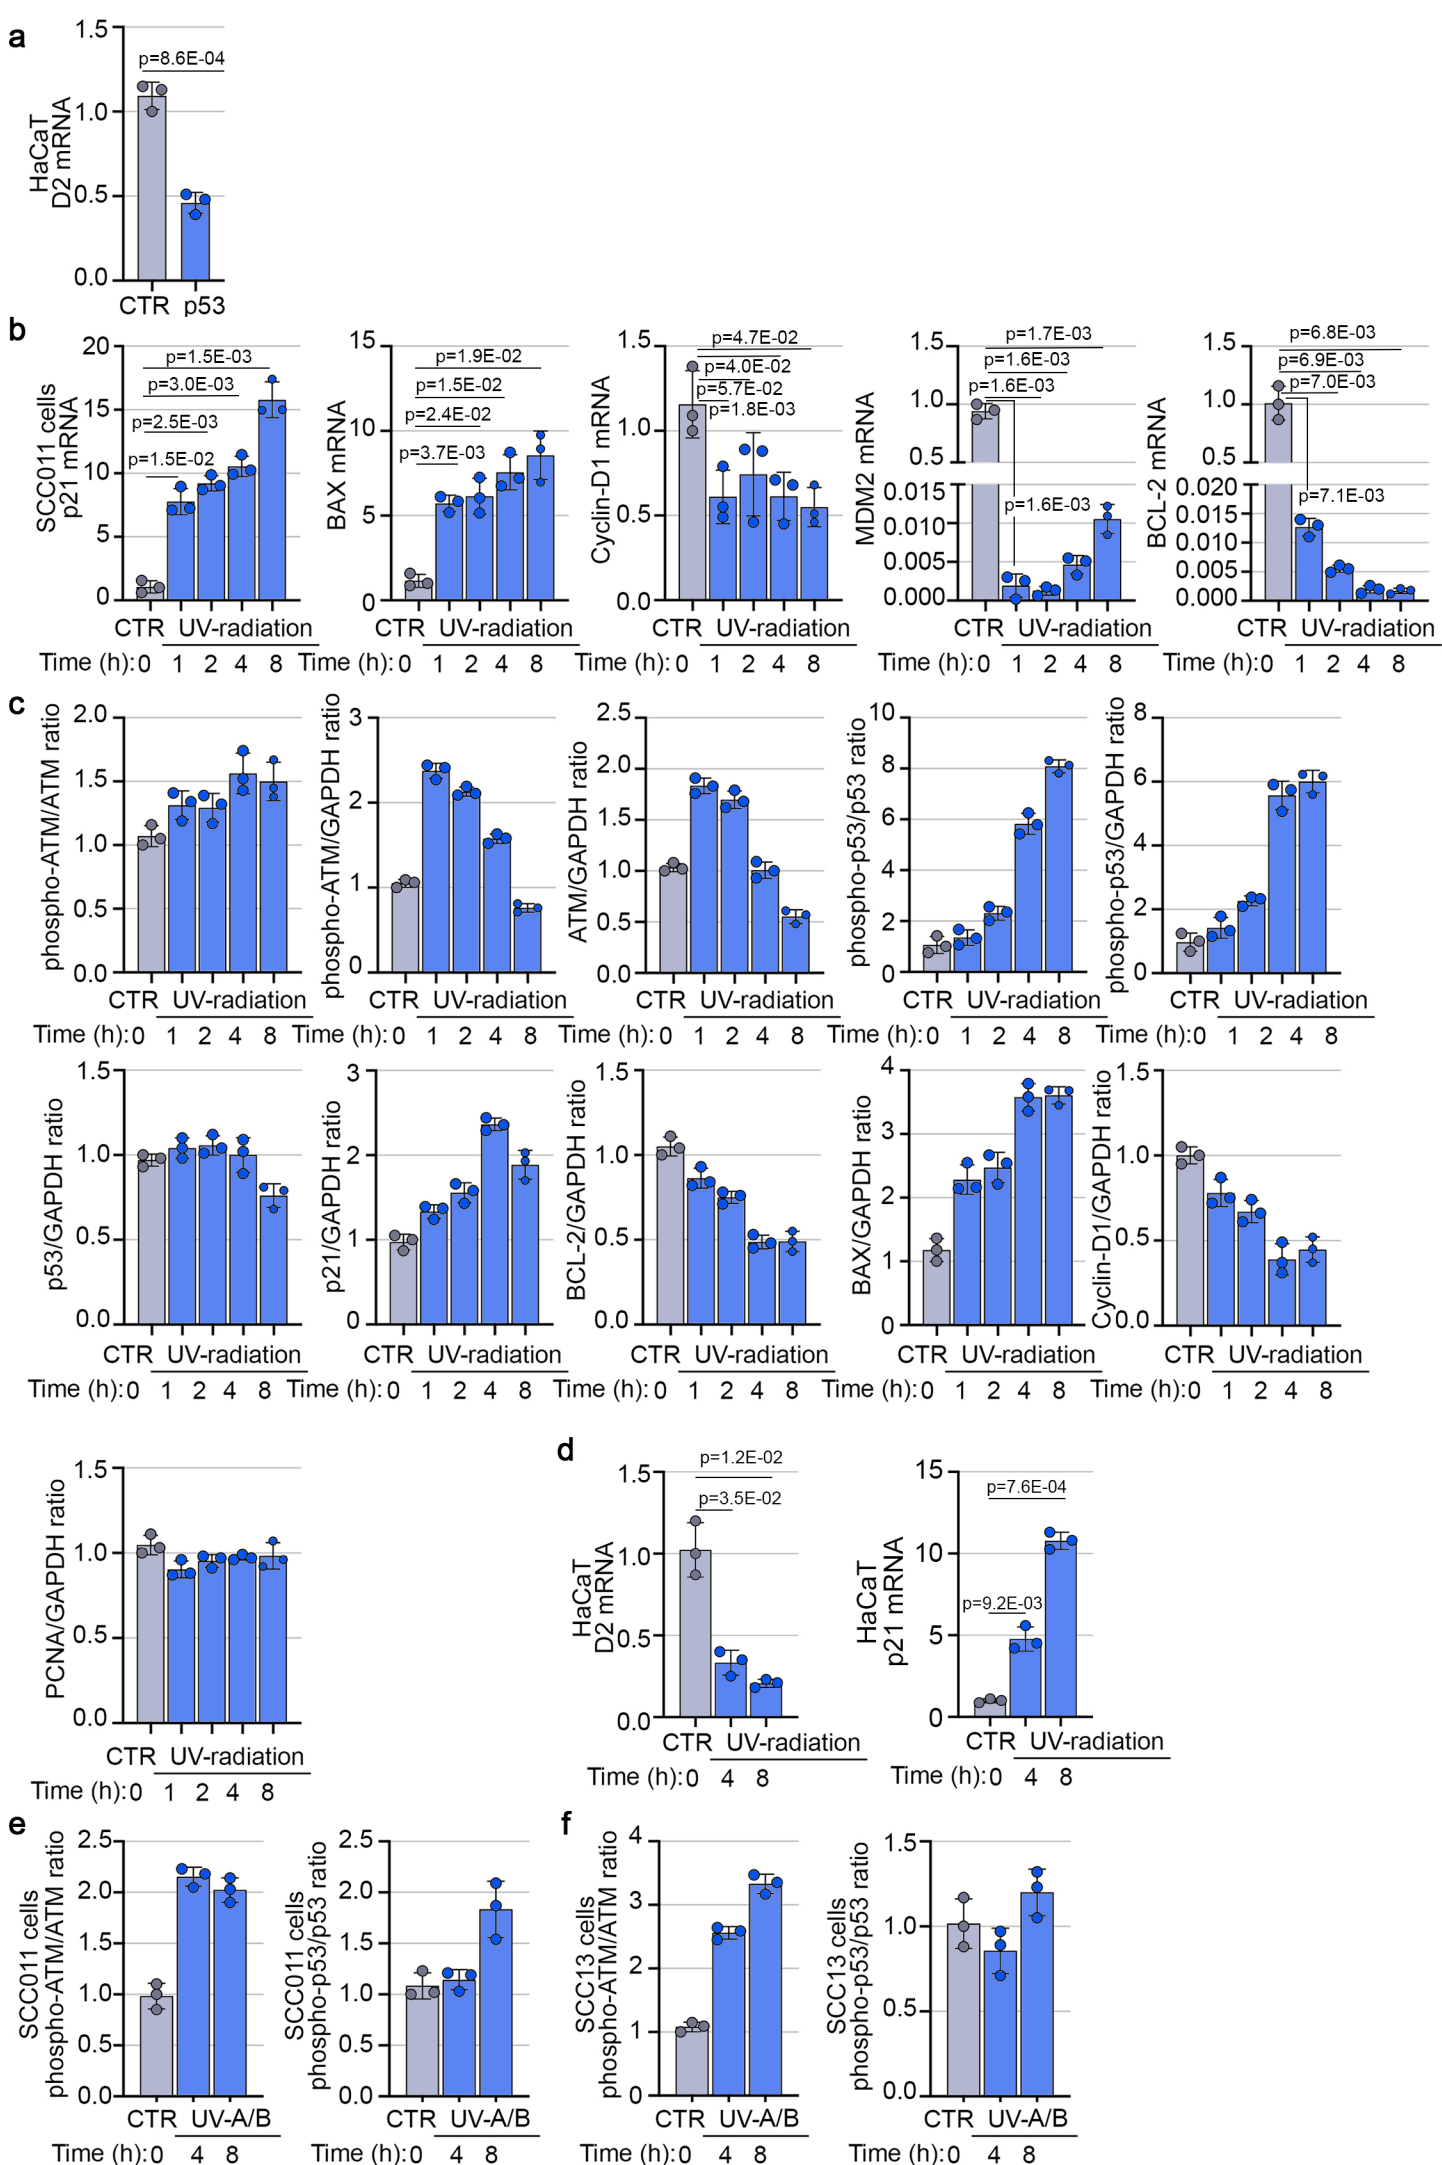

**Supplementary Fig. 2 | p53 activation induced by UV-radiation reduces D2 expression. a**, D2 mRNA expression was measured by Real-Time PCR in HaCaT cells transiently transfected with a

p53-expressing vector or a control empty plasmid (CTR) (n = 3 independent experiments). **b**, mRNA expression of p53 target genes, namely p21, BAX, Cyclin-D1, MDM-2 and BCL-2, was measured by Real-Time PCR in SCC011 cells, in a time course response to DNA damage induced by cellular exposure to UV-radiation (100  $\mu\text{J}/\text{cm}^2$ ) at the indicated time points (0, 1, 2, 4 and 8 hours) (n = 3 independent experiments). All the results are shown as means  $\pm$  SD from at least 3 separate experiments. p-values were determined by two-tailed Student's t-test. **c**, Quantification of the single protein levels *versus* GAPDH of Western Blot analysis in Fig. 2h are represented by histograms (n = 3 independent experiments). Data are shown as mean  $\pm$  SD of 3 independent experiments. **d**, D2 and p21 mRNA expression was measured by Real-Time PCR in HaCaT cells in a time course response to DNA damage induced by cellular exposure to UV-radiation (100  $\mu\text{J}/\text{cm}^2$ ) at the indicated time points (0, 4 and 8 hours) (n = 3 independent experiments). **e**, **f** Quantification of the single protein levels of Western Blot analysis in Fig. 2k (**e**) and Fig. 2l (**f**) are represented by histograms (n = 3 independent experiments). Data are shown as mean  $\pm$  SD of 3 independent experiments. Source data are provided as a Source Data file.

**a** hDI01\_promoter

| AC     | ID        | Score    | Loc. | Str. | Consensus Sequence | Signal Sequence |
|--------|-----------|----------|------|------|--------------------|-----------------|
| M00272 | V\$P53_02 | 0.825615 | 16   | (+)  | NGRCWTGYCY         | AGCCATGCTG      |
| M00272 | V\$P53_02 | 0.808030 | 16   | (-)  | NGRCWTGYCY         | AGCCATGCTG      |
| M00272 | V\$P53_02 | 0.796893 | 96   | (+)  | NGRCWTGYCY         | CTGCTTGCCG      |
| M00272 | V\$P53_02 | 0.832649 | 152  | (+)  | NGRCWTGYCY         | TGACTTCTCT      |
| M00272 | V\$P53_02 | 0.895369 | 252  | (+)  | NGRCWTGYCY         | TTACTTGTCT      |
| M00272 | V\$P53_02 | 0.809203 | 280  | (+)  | NGRCWTGYCY         | TGACTTCCTT      |
| M00272 | V\$P53_02 | 0.804513 | 340  | (+)  | NGRCWTGYCY         | TTGCAGGCCC      |
| M00272 | V\$P53_02 | 0.790152 | 488  | (-)  | NGRCWTGYCY         | GAGCCTGTAA      |
| M00272 | V\$P53_02 | 0.899472 | 551  | (+)  | NGRCWTGYCY         | AGACCAGCCT      |
| M00272 | V\$P53_02 | 0.885991 | 551  | (-)  | NGRCWTGYCY         | AGACCAGCCT      |
| M00272 | V\$P53_02 | 0.834408 | 575  | (+)  | NGRCWTGYCY         | AACCCTGTCT      |
| M00272 | V\$P53_02 | 0.799238 | 617  | (-)  | NGRCWTGYCY         | TGGCAGGCGC      |
| M00272 | V\$P53_02 | 0.805393 | 812  | (+)  | NGRCWTGYCY         | AAACATCTTT      |
| M00272 | V\$P53_02 | 0.806858 | 812  | (-)  | NGRCWTGYCY         | AAACATCTTT      |
| M00272 | V\$P53_02 | 0.804220 | 874  | (+)  | NGRCWTGYCY         | TGACTTGTGA      |
| M00272 | V\$P53_02 | 0.812720 | 874  | (-)  | NGRCWTGYCY         | TGACTTGTGA      |
| M00272 | V\$P53_02 | 0.827081 | 893  | (+)  | NGRCWTGYCY         | TAACAGGTTC      |
| M00272 | V\$P53_02 | 0.833529 | 893  | (-)  | NGRCWTGYCY         | TAACAGGTTC      |
| M00272 | V\$P53_02 | 0.871923 | 925  | (+)  | NGRCWTGYCY         | GTACTIONTTTT    |
| M00272 | V\$P53_02 | 0.834115 | 1033 | (-)  | NGRCWTGYCY         | AAACAGACCT      |
| M00272 | V\$P53_02 | 0.821219 | 1082 | (-)  | NGRCWTGYCY         | AGGCAAACAT      |
| M00272 | V\$P53_02 | 0.796307 | 1086 | (+)  | NGRCWTGYCY         | AAACATCTTC      |
| M00272 | V\$P53_02 | 0.791032 | 1086 | (-)  | NGRCWTGYCY         | AAACATCTTC      |
| M00272 | V\$P53_02 | 0.816237 | 1096 | (+)  | NGRCWTGYCY         | TGACCTGACT      |

**b** hDI03\_promoter

| AC     | ID        | Score    | Loc. | Str. | Consensus Sequence | Signal Sequence |
|--------|-----------|----------|------|------|--------------------|-----------------|
| M00272 | V\$P53_02 | 0.794842 | 20   | (+)  | NGRCWTGYCY         | GGGCCGGCCA      |
| M00272 | V\$P53_02 | 0.824736 | 20   | (-)  | NGRCWTGYCY         | GGGCCGGCCA      |
| M00272 | V\$P53_02 | 0.825029 | 46   | (+)  | NGRCWTGYCY         | GGAGTTGCCC      |
| M00272 | V\$P53_02 | 0.793083 | 103  | (+)  | NGRCWTGYCY         | TGACGCGTCC      |
| M00272 | V\$P53_02 | 0.858734 | 263  | (-)  | NGRCWTGYCY         | AGGCAAGCGG      |
| M00272 | V\$P53_02 | 0.801290 | 701  | (+)  | NGRCWTGYCY         | GGGCGGGCTC      |
| M00272 | V\$P53_02 | 0.835580 | 732  | (+)  | NGRCWTGYCY         | GGGCGAGCCA      |
| M00272 | V\$P53_02 | 0.820340 | 732  | (-)  | NGRCWTGYCY         | GGGCGAGCCA      |
| M00272 | V\$P53_02 | 0.814185 | 760  | (+)  | NGRCWTGYCY         | AAAGTTGCCT      |
| M00272 | V\$P53_02 | 0.790445 | 1120 | (-)  | NGRCWTGYCY         | GAGCTGGCTG      |
| M00272 | V\$P53_02 | 0.824736 | 1138 | (-)  | NGRCWTGYCY         | GGGCCCGCCC      |

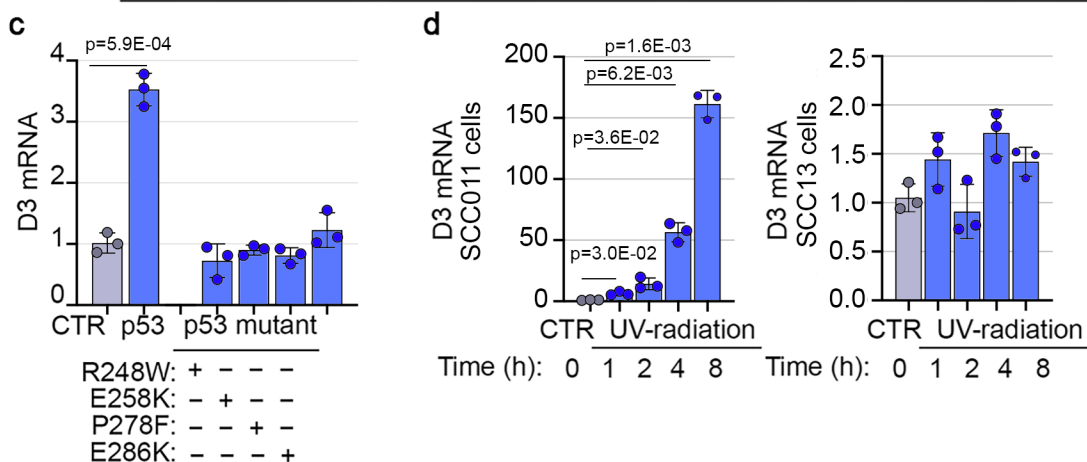

**Supplementary Fig. 3 | p53 positively regulates Type 3 deiodinase expression.** **a, b**, Analysis of the putative consensus “half-site” motifs for p53 (ID V\$P53\_02, AC M00272) within the *DIO1* (**a**) and *DIO3* (**b**) promoter region. **c**, D3 mRNA expression was measured by Real-Time PCR in SCC011 cells transiently transfected with four DNA-contact mutant p53 plasmids, carrying different p53 DNA-mutations (R248W, E258K, P278F and E286K). **d**, D3 mRNA expression was measured by Real-Time PCR in SCC011 and SCC13 cells, in a time course response to DNA damage induced by exposure to UV-C radiation (100  $\mu\text{J}/\text{cm}^2$ ) at the indicated time points (0, 1, 2, 4 and 8 hours). All the results in Fig. 3 c,d are shown as means  $\pm$  SD from at least 3 separate experiments. p-values were determined by two-tailed Student’s t-test. Source data are provided as a Source Data file.

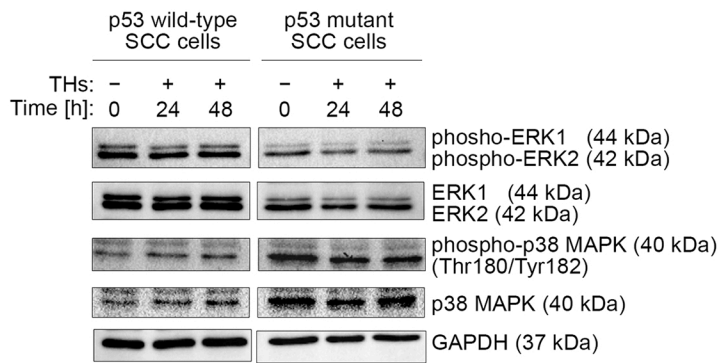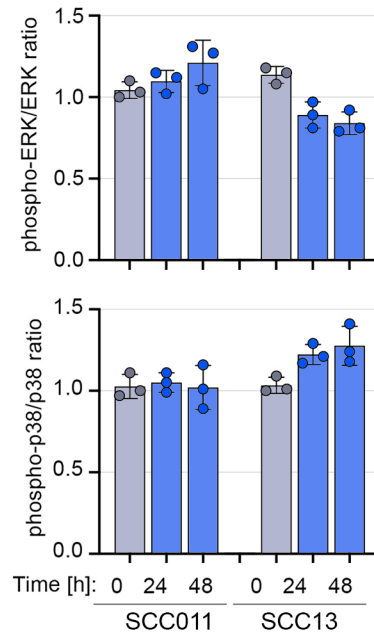

**Supplementary Fig. 4 | THs act mainly by their genomic action in SCC cells.** Western Blot analysis of phospho-ERK 1/2 and phospho-p38 MAPK in SCC011 and SCC13 cells treated or not with THs at 0, 24 and 48 hours. ERK 1/2, p38 MAPK and GAPDH expression was measured as a loading control. Quantification of the protein levels of phospho-ERK 1/2 versus ERK 1/2 and phospho-p38 MAPK versus p38 MAPK levels are represented by histograms. Data are shown as means  $\pm$  SD from represent the mean of 3 independent experiments (n = 3 independent experiments). p-values were determined by two-tailed Student's t-test. Source data are provided as a Source Data file.



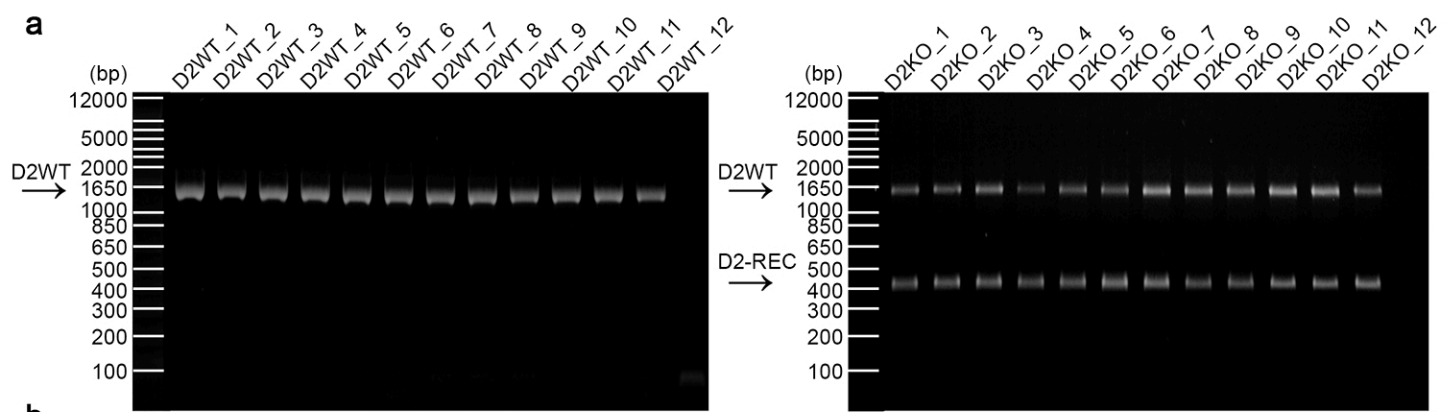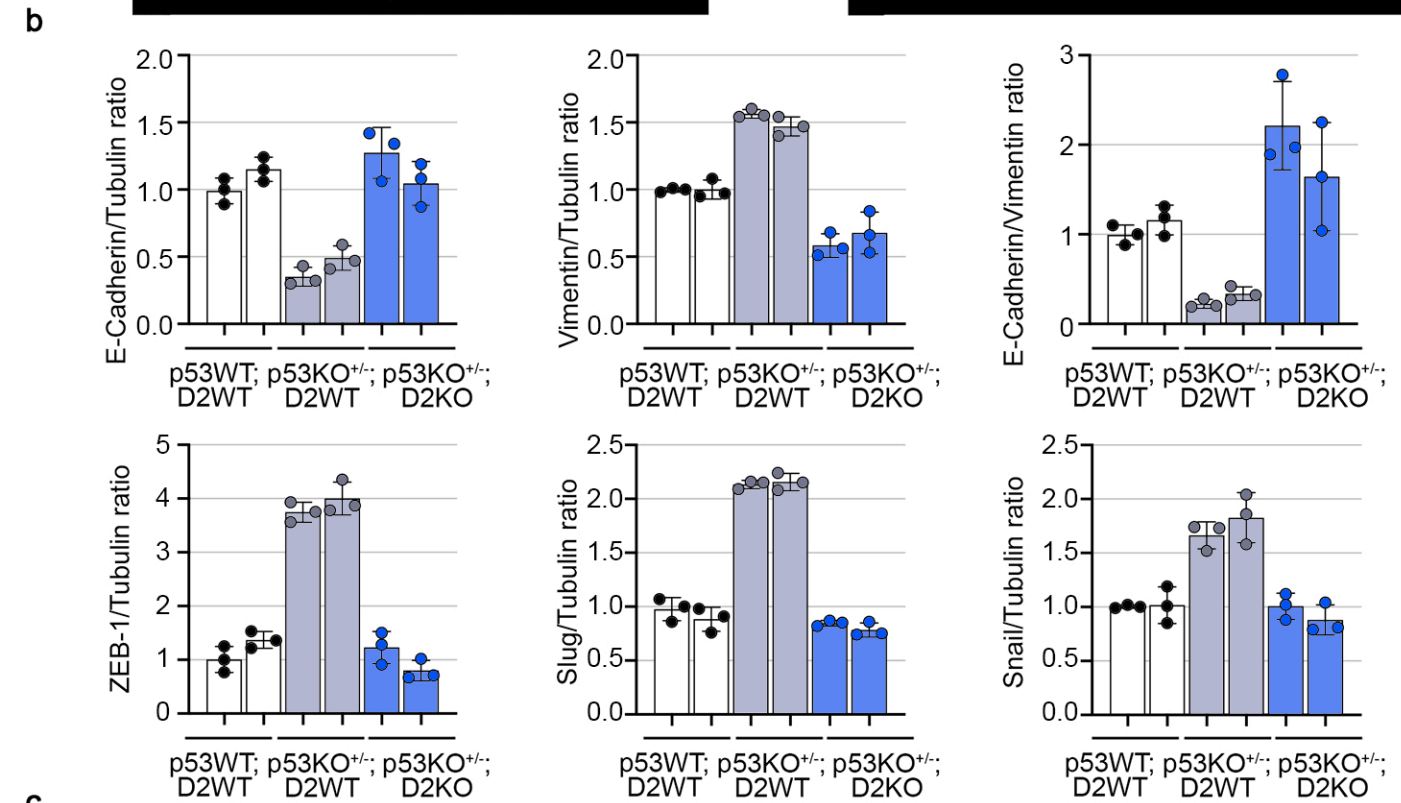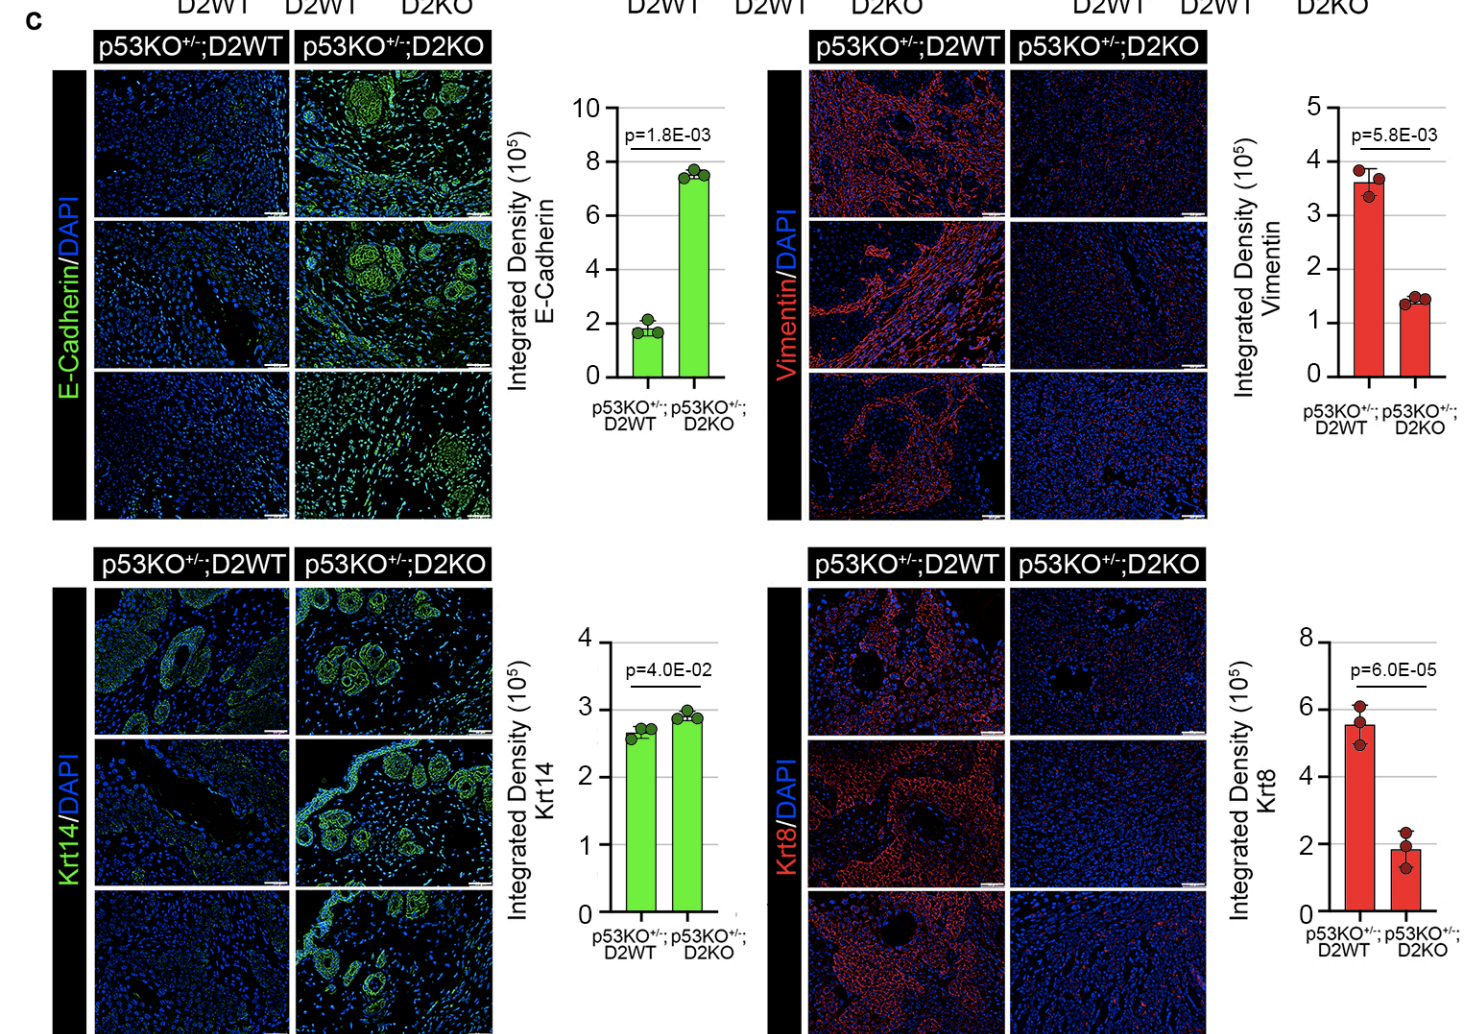

**Supplementary Fig. 5 | *Dio2* depletion in the epidermal compartment attenuates the p53-driven tumorigenesis.** **a**, *Dio2* genetic depletion in epidermal compartment was confirmed by PCR analysis of the dorsal skin sections of p53KO<sup>+/-</sup>;D2KO and p53KO<sup>+/-</sup>;D2WT mice, these latter used as *Dio2* control mice. D2WT band indicate the full length D2 and D2-REC indicates the recombinant D2 fragment generated by the CRE Recombinase (n = 12 mice). **b**, Quantification of the single protein levels *versus* Tubulin of Western Blot analysis in Fig. 3k are represented by histograms (n = 3 independent experiments). Data are shown as mean ± SD of 3 independent experiments. **c**, IF staining with epithelial (E-Cadherin, Krt14) and mesenchymal (Vimentin, Krt8) markers of skin lesions from i) p53KO<sup>+/-</sup>;D2WT and ii) p53KO<sup>+/-</sup>;D2KO mice . Magnification 20X. Scale bars represent 50 μm. Relative quantification of the single immunofluorescent signals (Integrated Density) are represented by histograms (representative of 3 images per sample, n = 3 mice). All the results are shown as means ± SD from at least 3 separate experiments. p-values were determined by two-tailed Student's t-test. Source data are provided as a Source Data file.



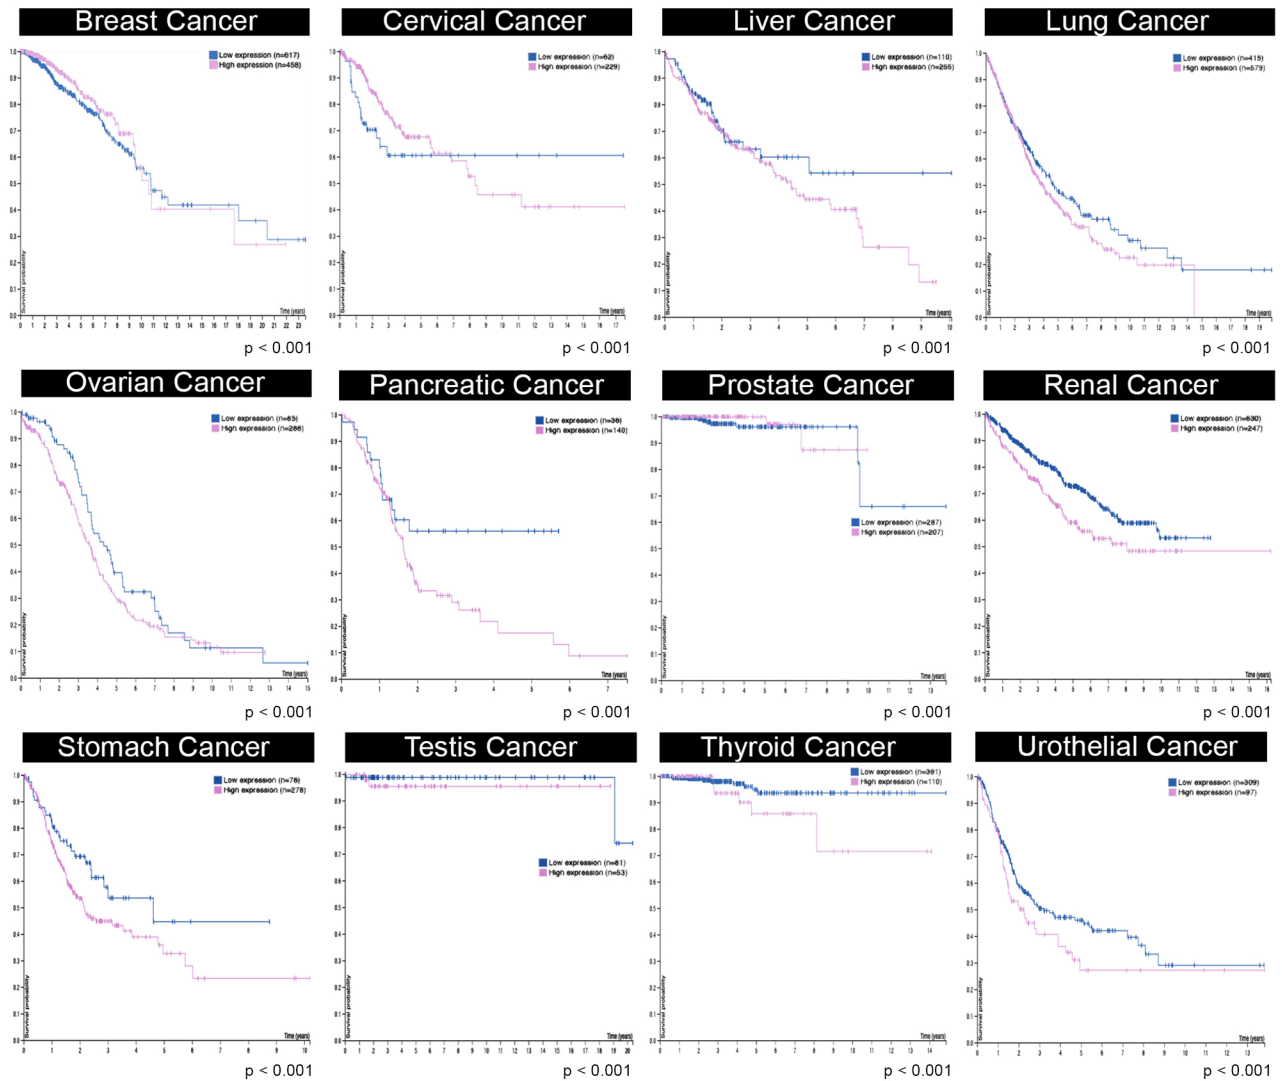

**Supplementary Fig. 6 | Analyses of the TCGA data, protein atlas and Kaplan-Meier survival analysis for *DIO2* in different human malignancies.** Kaplan-Meier survival plots showing the Overall Survival (OS) in distinct tumor types in which patients were stratified in high (pink) and low (blue) based on *DIO2* expression ([www.proteinatlas.org/ENSG00000211448](http://www.proteinatlas.org/ENSG00000211448)). p-values were determined by log-rank tests and the number of patients in each group is provided in the figure. Source data are provided as a Source Data file.

## Bladder Carcinoma

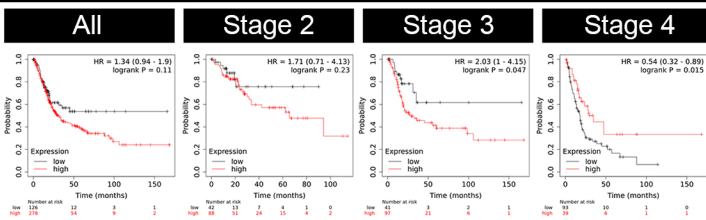

## Breast Cancer

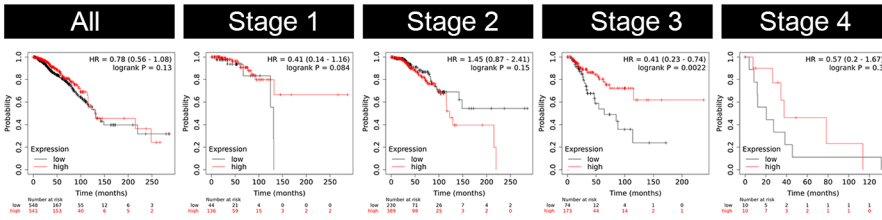

## Cervical Squamous Cell Carcinoma

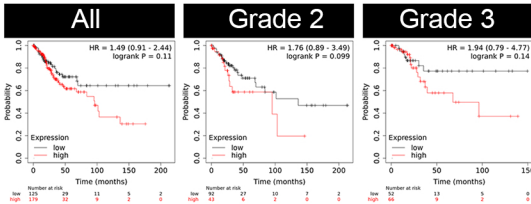

## Esophageal Adenocarcinoma

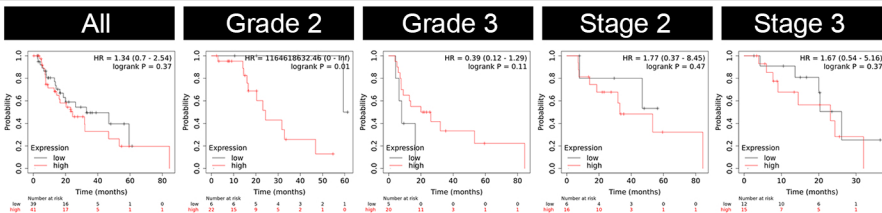

## Esophageal Squamous Cell Carcinoma

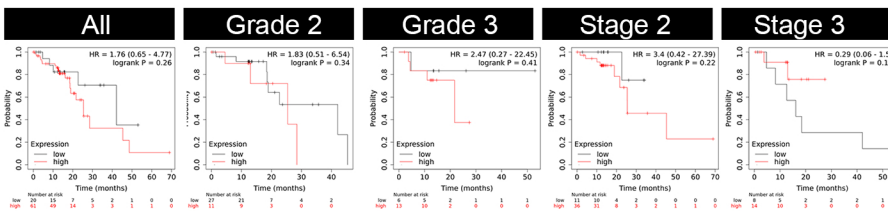

## Head and Neck Squamous Cell Carcinoma

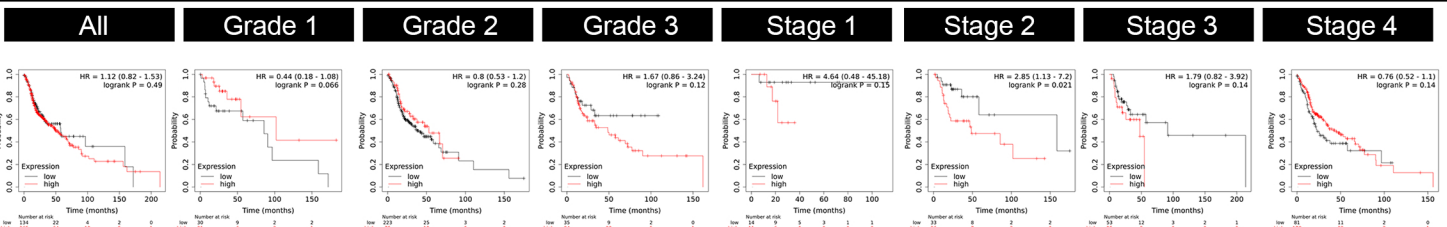

## Kidney Renal Clear Cell Carcinoma

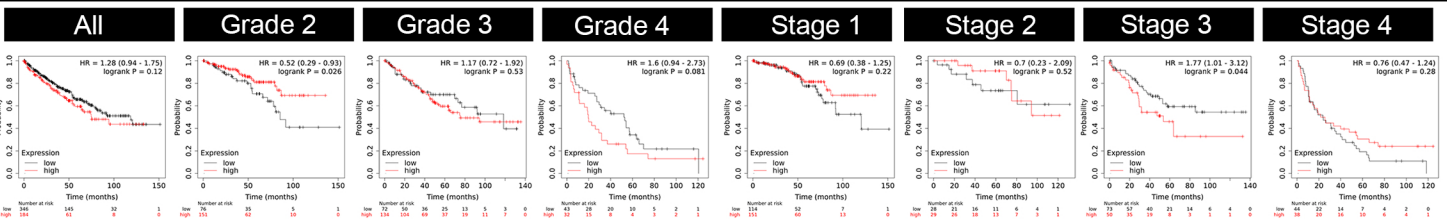

**Supplementary Fig. 7 | Correlation of *DIO2* expression with different tumor types.** Kaplan-Meier survival plots showing the Overall Survival (OS) in distinct tumor types in which patients were stratified in high (red) and low (black) based on *DIO2/TP53* expression ratio and divided, where possible, for tumor stage and grade using the KM-Plotter data set (doi.org/10.1038/s41598-021-84787-5). p-values were determined by log-rank tests and the number of patients in each group is provided in the figure.

## Kidney Renal Papillary Cell Carcinoma

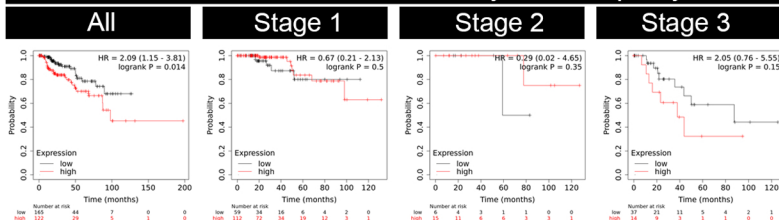

## Liver Hepatocellular Carcinoma

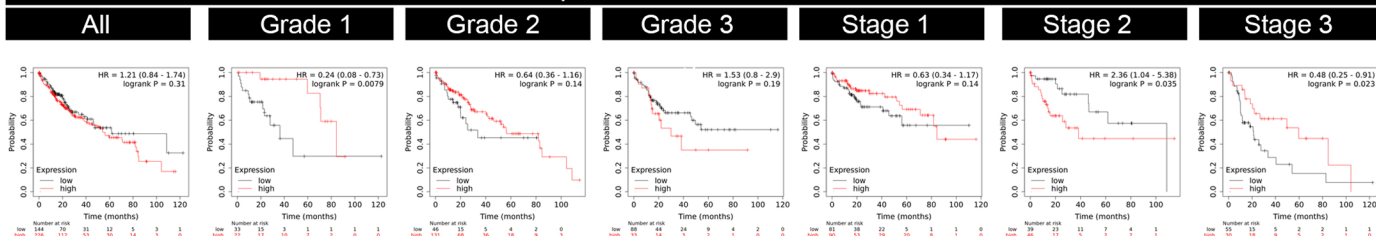

## Lung Adenocarcinoma

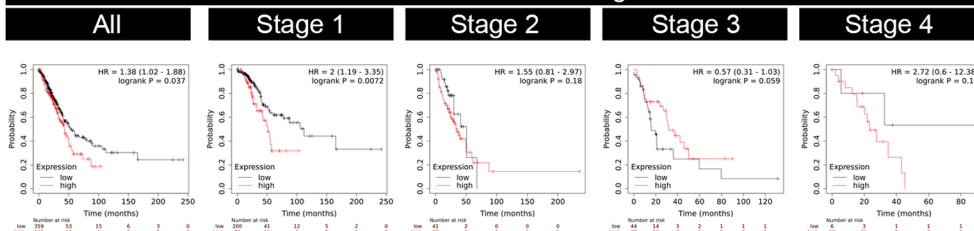

## Lung Squamous Cell Carcinoma

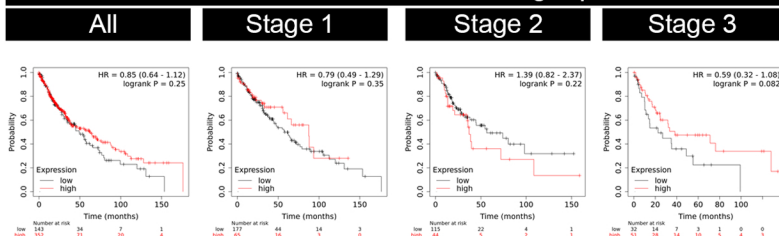

## Ovarian Cancer

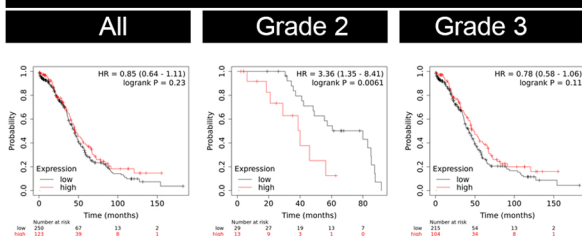

## Pancreatic Ductal Adenocarcinoma

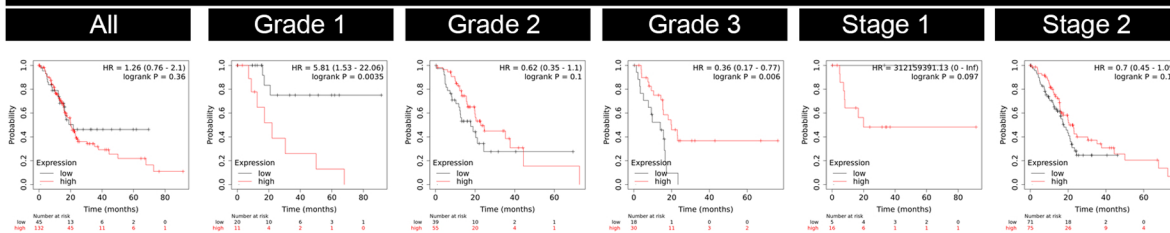

## Rectum Adenocarcinoma

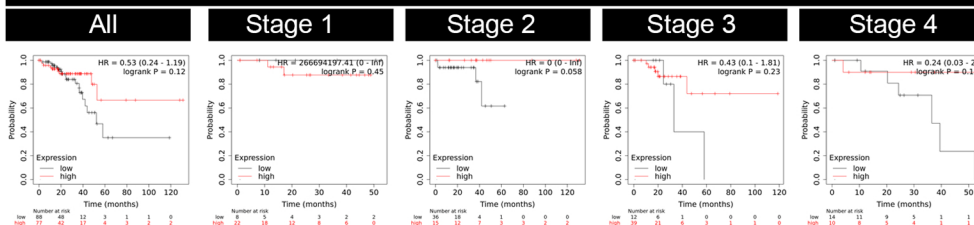

**Supplementary Fig. 8 | Correlation of *DIO2* expression with different tumor types.** Kaplan-Meier survival plots showing the Overall Survival (OS) in distinct tumor types in which patients were stratified in high (red) and low (black) based on *DIO2/TP53* expression ratio and divided, where possible, for tumor stage and grade using the KM-Plotter data set (doi.org/10.1038/s41598-021-84787-5). p-values were determined by log-rank tests and the number of patients in each group is provided in the figure.

## Stomach Adenocarcinoma

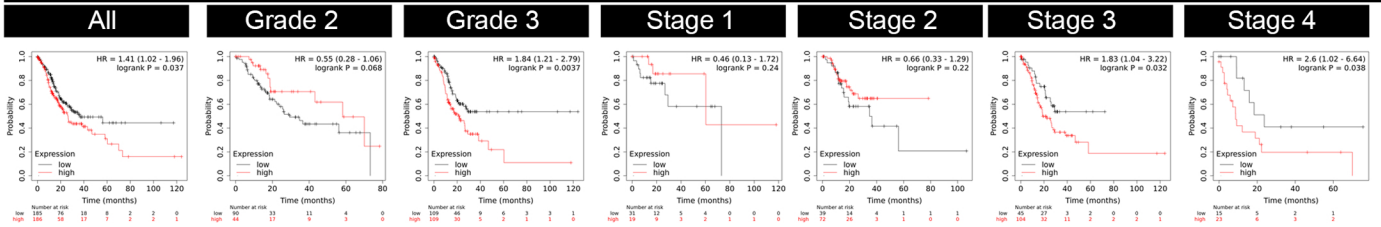

## Thyroid Carcinoma

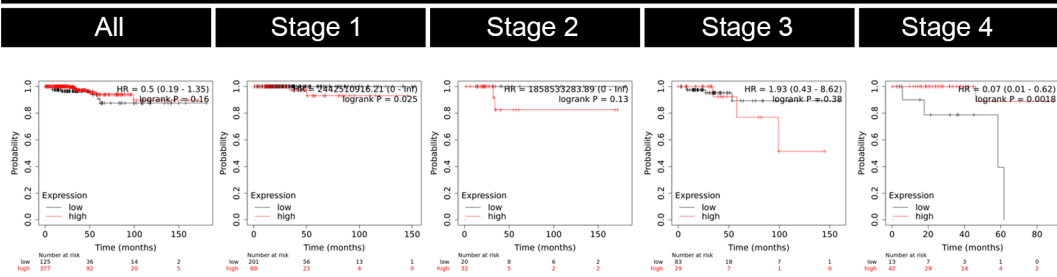

## Uterine Corpus Endometrial Carcinoma

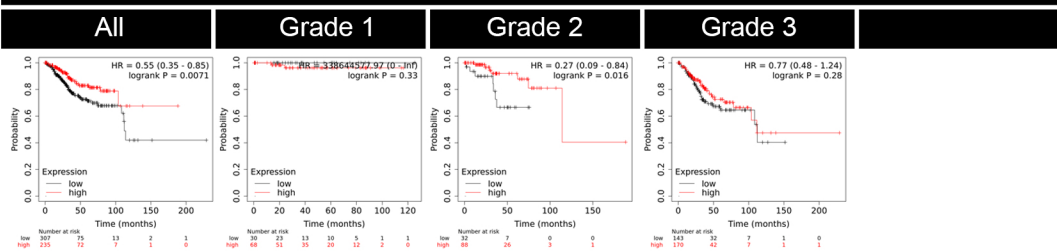

**Supplementary Fig. 9 | Correlation of *DIO2* expression with different tumor types.** Kaplan-Meier survival plots showing the Overall Survival (OS) in distinct tumor types in which patients were stratified in high (red) and low (black) based on *DIO2/TP53* expression ratio and divided, where possible, for tumor stage and grade using the KM-Plotter data set (doi.org/10.1038/s41598-021-84787-5). p-values were determined by log-rank tests and the number of patients in each group is provided in the figure.

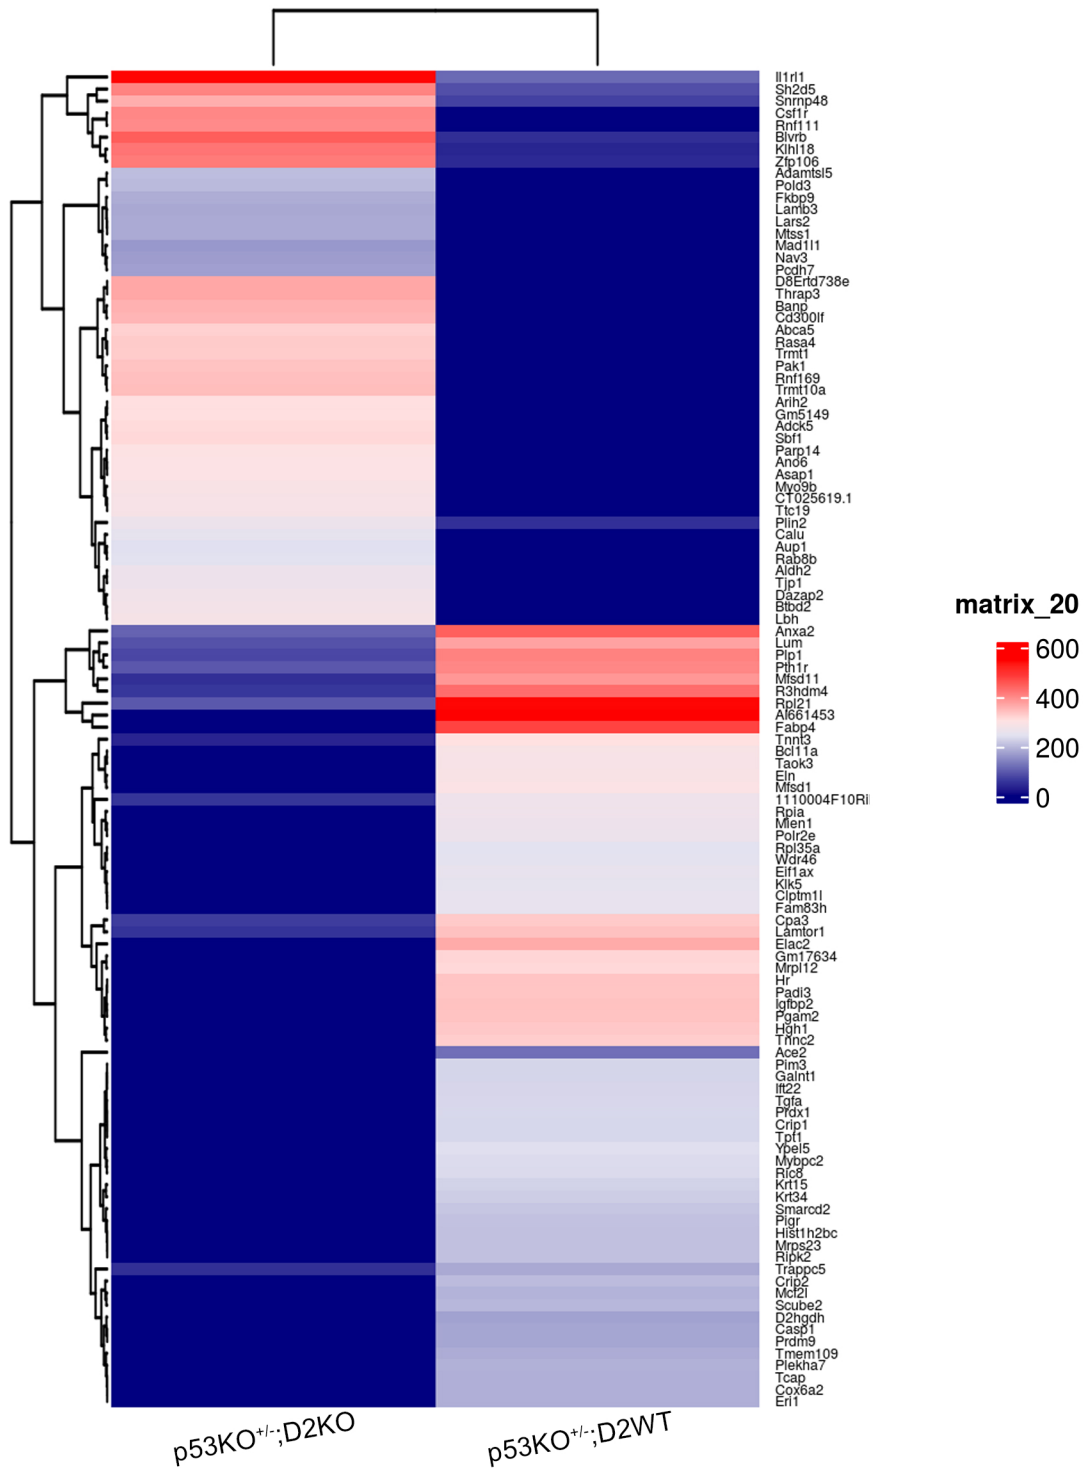

**Supplementary Fig. 10 | D2 inhibition fosters the DNA damage repair mechanisms in skin cancer.** Expression heatmap of 111 Differentially Expressed Genes (DEGs) that were expressed across i) p53KO<sup>+/-</sup>;D2WT and ii) p53KO<sup>+/-</sup>;D2KO mice.



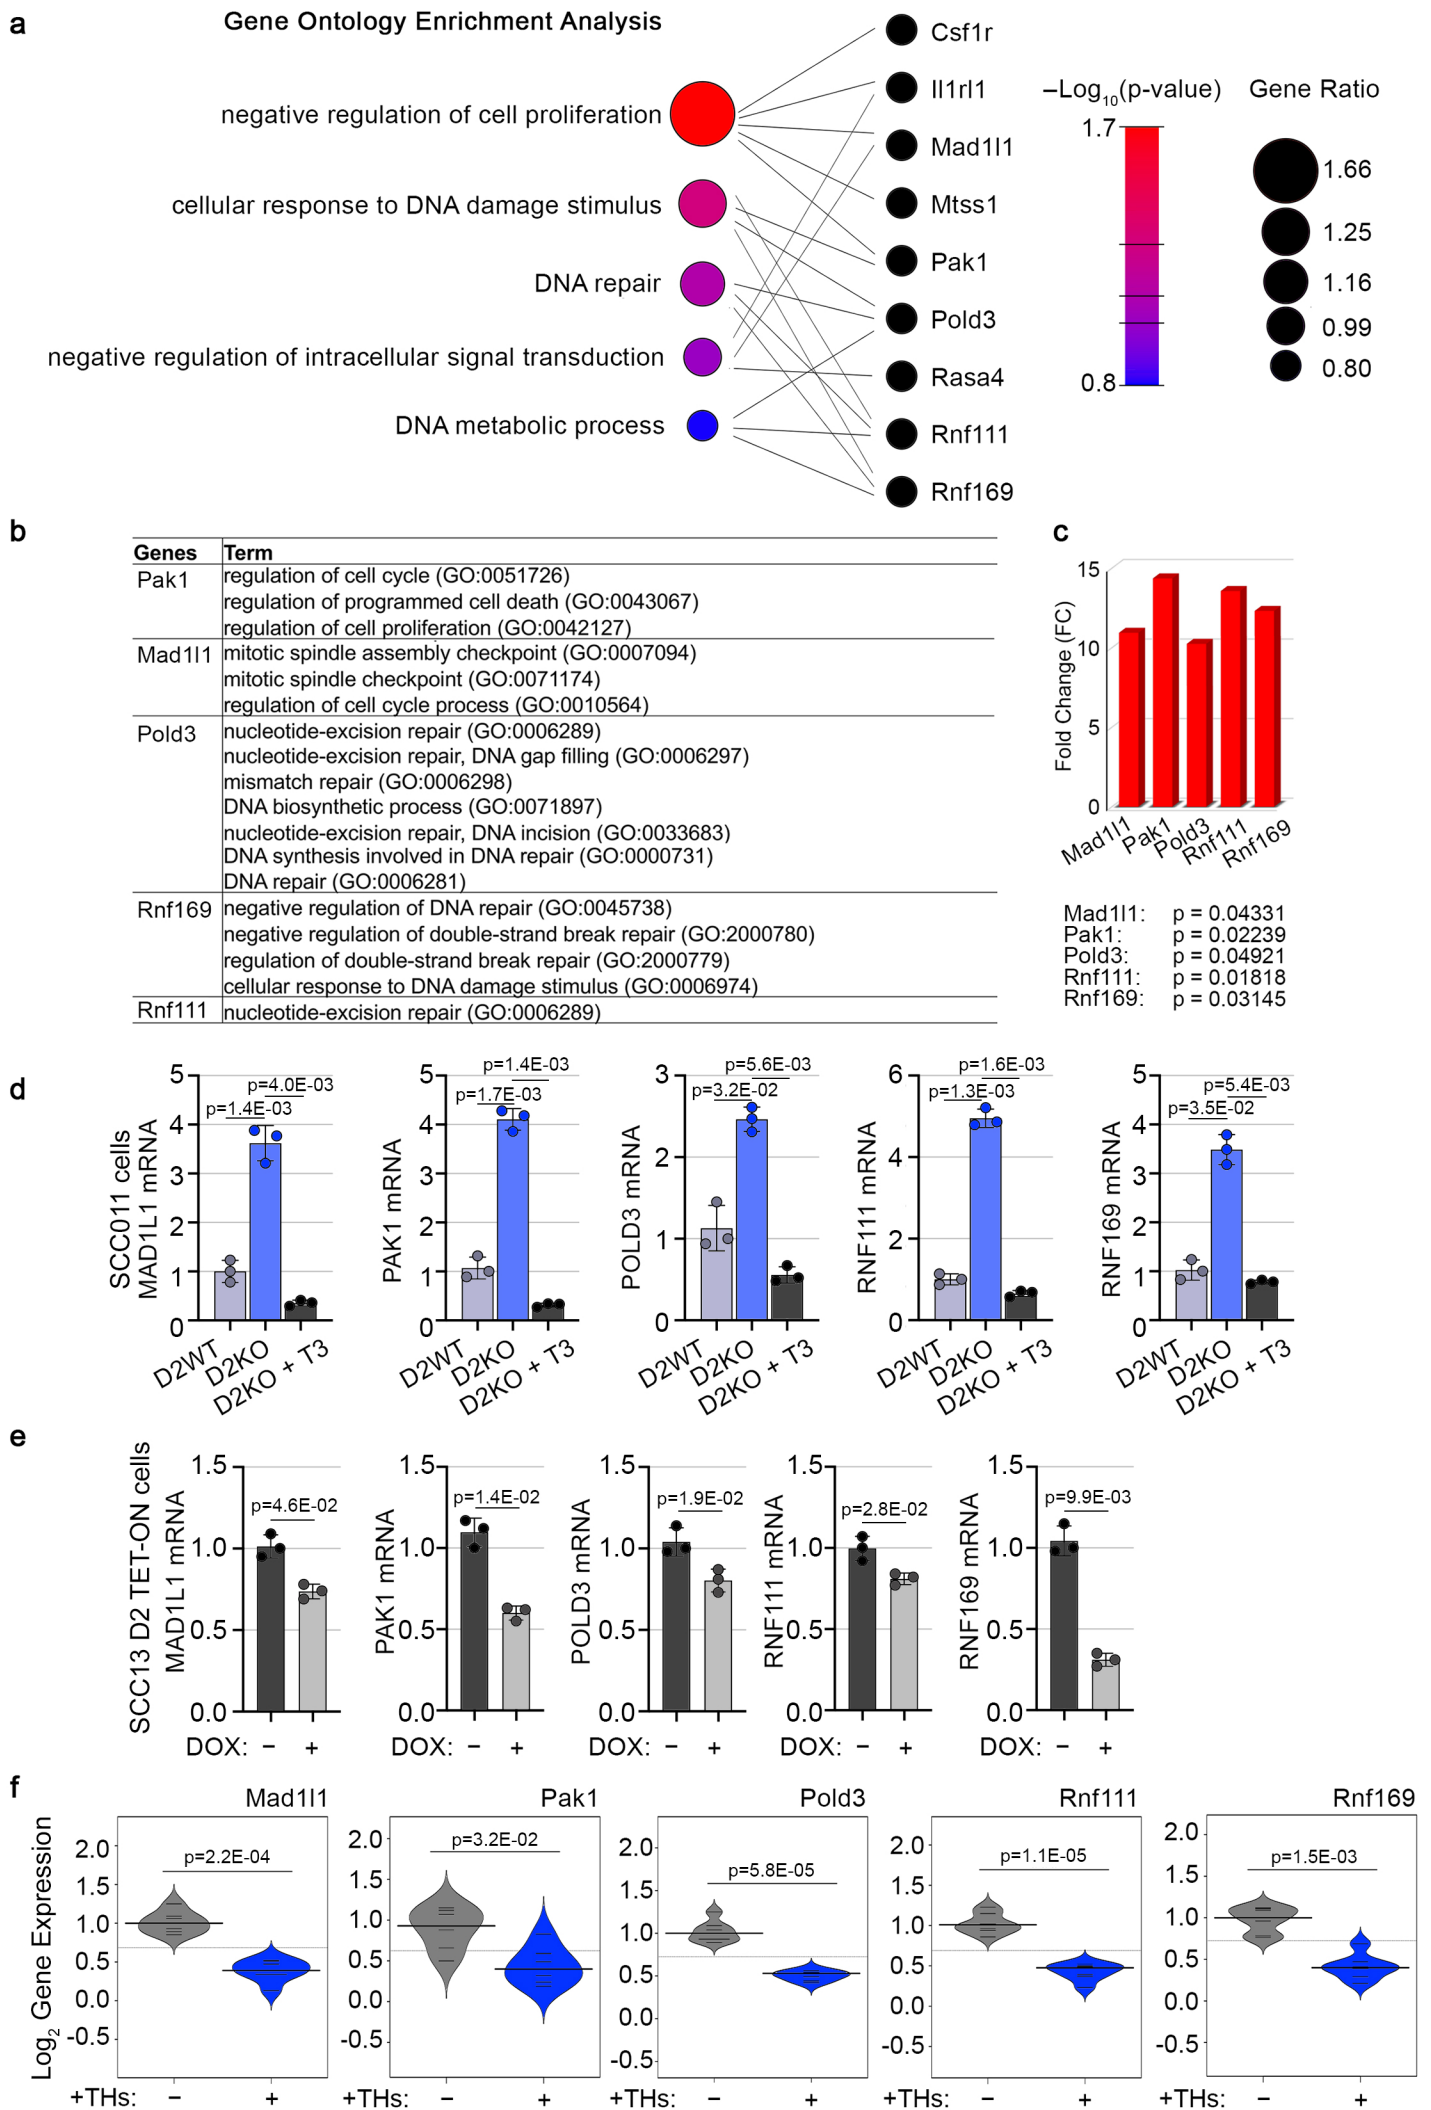

**Supplementary Fig. 11 | TH signaling impairs the DNA damage repair mechanisms in skin tumorigenesis.** a, Gene Ontology (GO) Enrichment Analysis of Biological Processes (BPs) and functional cluster analysis were analyzed by Metascape Gene Annotation & Analysis Resource



(<https://metascape.org/gp/index>). GO terms were extracted analyzing all the 111 identified DEGs (65 of them negatively regulated for value of Log<sub>2</sub> Fold-Change (FC)  $\leq -1.5$  and 46 positively regulated for value of Log<sub>2</sub> Fold-Change (FC)  $\geq 1.5$ , both with  $p < 0.05$ ) across i) p53KO<sup>+/-</sup>;D2WT and ii) p53KO<sup>+/-</sup>;D2KO mice. **b**, Gene Ontology (GO) enrichment of the top 5 selected DEGs, namely *Mad11l*, *Pak1*, *Pold3*, *Rnf111* and *Rnf169*, according to the molecular function category. **c**, Fold Change (FC) expression of the top 5 DEGs from RNA-seq analysis of SCC tumors from dorsal skin of i) p53KO<sup>+/-</sup>;D2WT and ii) p53KO<sup>+/-</sup>;D2KO mice. **d**, mRNA expression of *MAD1L1*, *PAK1*, *POLD3*, *RNF111* and *RNF169* was measured by Real-Time PCR in D2WT *versus* D2KO SCC011 cells, treated or not with T3 (30.0 nM/24 hours) ( $n = 3$  independent experiments). **e**, mRNA expression of *MAD1L1*, *PAK1*, *POLD3*, *RNF111* and *RNF169* was measured by Real-Time PCR in SCC13 Tet-ON-D2 cells treated or not with doxycycline (DOX, 2  $\mu$ g/mL) for 24 hours ( $n = 3$  independent experiments). **f**, Bean Plots represent the Log<sub>2</sub> gene expression of the top 5 DEGs measured by Real-Time PCR in SCC tumors from dorsal skin of p53WT;D2WT and p53WT;D2KO mice, treated or not with THs in drinking water ( $n = 7$  mice/group). All the results are shown as means  $\pm$  SD from at least 3 separate experiments. p-values were determined by two-tailed Student's t-test. Source data are provided as a Source Data file.

**a (i)**

| AC     | ID        | Score    | Loc. | Str. | Consensus Sequence | Signal Sequence  |
|--------|-----------|----------|------|------|--------------------|------------------|
| M00239 | V\$T3R_01 | 0.730078 | 74   | (-)  | SNNTRAGGTCACGSNN   | CTTCTTGGCCACACAG |
| M00239 | V\$T3R_01 | 0.794814 | 98   | (+)  | SNNTRAGGTCACGSNN   | AAGGAAGGGCACTGTG |
| M00239 | V\$T3R_01 | 0.788756 | 298  | (+)  | SNNTRAGGTCACGSNN   | AACTAAGTTCAGGGGC |
| M00239 | V\$T3R_01 | 0.736513 | 460  | (-)  | SNNTRAGGTCACGSNN   | TGCCTTGACGGGACTT |
| M00239 | V\$T3R_01 | 0.748060 | 526  | (+)  | SNNTRAGGTCACGSNN   | CTCTGAGAGCACCACG |
| M00239 | V\$T3R_01 | 0.832671 | 594  | (+)  | SNNTRAGGTCACGSNN   | GGGTGAGGCCACTCAT |
| M00239 | V\$T3R_01 | 0.763013 | 652  | (+)  | SNNTRAGGTCACGSNN   | GCTTGAAGTCAGGAGT |
| M00239 | V\$T3R_01 | 0.739920 | 1470 | (+)  | SNNTRAGGTCACGSNN   | CAGGATGGTCTCGATC |
| M00239 | V\$T3R_01 | 0.766799 | 1840 | (+)  | SNNTRAGGTCACGSNN   | GACAAAGGTTACCATA |
| M00239 | V\$T3R_01 | 0.890403 | 1865 | (-)  | SNNTRAGGTCACGSNN   | GGGCCTGACCTCACCC |
| M00239 | V\$T3R_01 | 0.780806 | 1867 | (+)  | SNNTRAGGTCACGSNN   | GCCTGACCTCACCCCA |
| M00239 | V\$T3R_01 | 0.739920 | 1888 | (-)  | SNNTRAGGTCACGSNN   | TGCTGTGCCCTGGCTT |

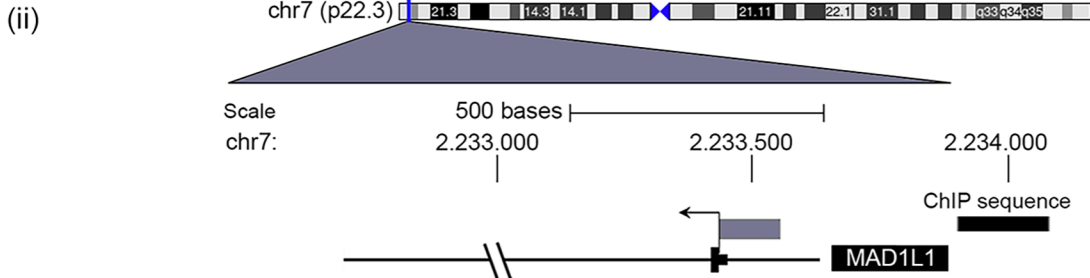

**b (i)**

| AC     | ID        | Score    | Loc. | Str. | Consensus Sequence | Signal Sequence   |
|--------|-----------|----------|------|------|--------------------|-------------------|
| M00239 | V\$T3R_01 | 0.801439 | 129  | (-)  | SNNTRAGGTCACGSNN   | ACTTCTGACCTCAGGT  |
| M00239 | V\$T3R_01 | 0.743706 | 153  | (-)  | SNNTRAGGTCACGSNN   | TGCCTTGGCCTCCCAA  |
| M00239 | V\$T3R_01 | 0.730645 | 196  | (-)  | SNNTRAGGTCACGSNN   | GCGCCTGGCCTTATTA  |
| M00239 | V\$T3R_01 | 0.731024 | 491  | (+)  | SNNTRAGGTCACGSNN   | GCTTGAAGACATGAAG  |
| M00239 | V\$T3R_01 | 0.768124 | 595  | (+)  | SNNTRAGGTCACGSNN   | CAGTCAGGTAATAAAG  |
| M00239 | V\$T3R_01 | 0.752792 | 623  | (-)  | SNNTRAGGTCACGSNN   | GAGTTTGAAC TTTATC |
| M00239 | V\$T3R_01 | 0.749574 | 670  | (+)  | SNNTRAGGTCACGSNN   | ACGGGAGGACATCATC  |
| M00239 | V\$T3R_01 | 0.761121 | 1262 | (+)  | SNNTRAGGTCACGSNN   | ATCTGAGCTCAGGAGA  |
| M00239 | V\$T3R_01 | 0.738974 | 1349 | (+)  | SNNTRAGGTCACGSNN   | ATGTCAGTTCACATTA  |
| M00239 | V\$T3R_01 | 0.777021 | 1448 | (-)  | SNNTRAGGTCACGSNN   | GGCTGTGAGATCACAC  |
| M00239 | V\$T3R_01 | 0.857657 | 1450 | (+)  | SNNTRAGGTCACGSNN   | CTGTGAGATCACCGA   |
| M00239 | V\$T3R_01 | 0.738785 | 1494 | (-)  | SNNTRAGGTCACGSNN   | GACAACGAGCTCATAG  |
| M00239 | V\$T3R_01 | 0.734242 | 1496 | (+)  | SNNTRAGGTCACGSNN   | CAACGAGCTCATAGAT  |
| M00239 | V\$T3R_01 | 0.757903 | 1668 | (-)  | SNNTRAGGTCACGSNN   | AACAGTGACGCGACGC  |
| M00239 | V\$T3R_01 | 0.831724 | 1681 | (-)  | SNNTRAGGTCACGSNN   | CGCGATGACGTCACGC  |
| M00239 | V\$T3R_01 | 0.852735 | 1683 | (+)  | SNNTRAGGTCACGSNN   | CGATGACGTCACGCAG  |
| M00239 | V\$T3R_01 | 0.829642 | 1719 | (+)  | SNNTRAGGTCACGSNN   | CTCTGGCCTCACGCGC  |
| M00239 | V\$T3R_01 | 0.736324 | 1733 | (-)  | SNNTRAGGTCACGSNN   | GCCGATGACGTAATCC  |
| M00239 | V\$T3R_01 | 0.742949 | 1735 | (+)  | SNNTRAGGTCACGSNN   | CGATGACGTAATCCCA  |
| M00239 | V\$T3R_01 | 0.760742 | 1774 | (-)  | SNNTRAGGTCACGSNN   | GGGTTTGGCCTCGCTC  |
| M00239 | V\$T3R_01 | 0.736135 | 1836 | (+)  | SNNTRAGGTCACGSNN   | CGGGGCGGGCACGGCT  |
| M00239 | V\$T3R_01 | 0.748060 | 1975 | (+)  | SNNTRAGGTCACGSNN   | CTAGGCGGTCAGGCCT  |

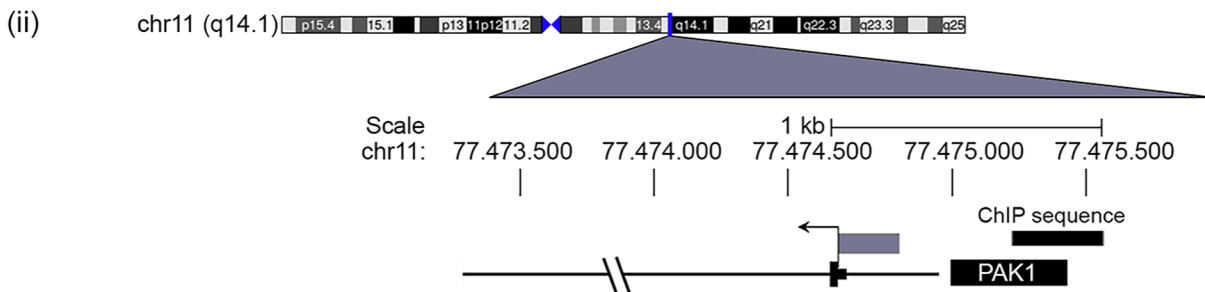

**Supplementary Fig. 12 | Positions of Thyroid Hormone Receptor binding sites within *MAD1L1* and *PAK1* promoter genes.** **a, (i)** Consensus sequence analysis of the 12 different putative consensus motifs for Thyroid Hormone Receptor (ID V\$T3R\_01, AC M00239) within the *MAD1L1* promoter region. **(ii)** The mammalian structure and position from Genome Browser are indicated for the *MAD1L1* promoter. The black box represents the sequence analyzed by ChIP. **b, (i)** Consensus sequence analysis of the 22 different putative consensus motifs for Thyroid Hormone Receptor (ID V\$T3R\_01, AC M00239) within the *PAK1* promoter region. **(ii)** The mammalian structure and position from Genome Browser are indicated for the *PAK1* promoter. The black box represents the sequence analyzed by ChIP.

**a (i)**

| AC     | ID        | Score    | Loc. | Str. | Consensus Sequence | Signal Sequence  |
|--------|-----------|----------|------|------|--------------------|------------------|
| M00239 | V\$T3R_01 | 0.761310 | 118  | (-)  | SNNTRAGGTCACGSNN   | AACTGGGACCACAGAC |
| M00239 | V\$T3R_01 | 0.743706 | 249  | (-)  | SNNTRAGGTCACGSNN   | TGCCTTGGCCTCCCAA |
| M00239 | V\$T3R_01 | 0.776831 | 336  | (+)  | SNNTRAGGTCACGSNN   | GAGGGGGGTCTCACTC |
| M00239 | V\$T3R_01 | 0.816392 | 381  | (+)  | SNNTRAGGTCACGSNN   | ATCTCAGTCCACCGTC |
| M00239 | V\$T3R_01 | 0.830778 | 539  | (-)  | SNNTRAGGTCACGSNN   | ACTCCTGACCTCAGGT |
| M00239 | V\$T3R_01 | 0.755821 | 670  | (-)  | SNNTRAGGTCACGSNN   | TGGCATGATCTCGGCT |
| M00239 | V\$T3R_01 | 0.759417 | 677  | (+)  | SNNTRAGGTCACGSNN   | ATCTCGGCTCACTGCA |
| M00239 | V\$T3R_01 | 0.830778 | 835  | (-)  | SNNTRAGGTCACGSNN   | ACTCCTGACCTCAGGT |
| M00239 | V\$T3R_01 | 0.755631 | 842  | (+)  | SNNTRAGGTCACGSNN   | ACCTCAGGTGATTCAT |
| M00239 | V\$T3R_01 | 0.746356 | 1157 | (-)  | SNNTRAGGTCACGSNN   | AAGAATTACCTAAGTT |
| M00239 | V\$T3R_01 | 0.740867 | 1164 | (+)  | SNNTRAGGTCACGSNN   | ACCTAAGTTTACACAA |
| M00239 | V\$T3R_01 | 0.770396 | 1714 | (-)  | SNNTRAGGTCACGSNN   | TTGAGAGACCATATTC |
| M00239 | V\$T3R_01 | 0.731970 | 1857 | (+)  | SNNTRAGGTCACGSNN   | CCAGGAGGCCCGCAC  |
| M00239 | V\$T3R_01 | 0.739542 | 1952 | (-)  | SNNTRAGGTCACGSNN   | GTGCGTCGCCTCCGTT |
| M00239 | V\$T3R_01 | 0.742381 | 1980 | (-)  | SNNTRAGGTCACGSNN   | ACCCGGGACCTGGGAG |

**(ii)**

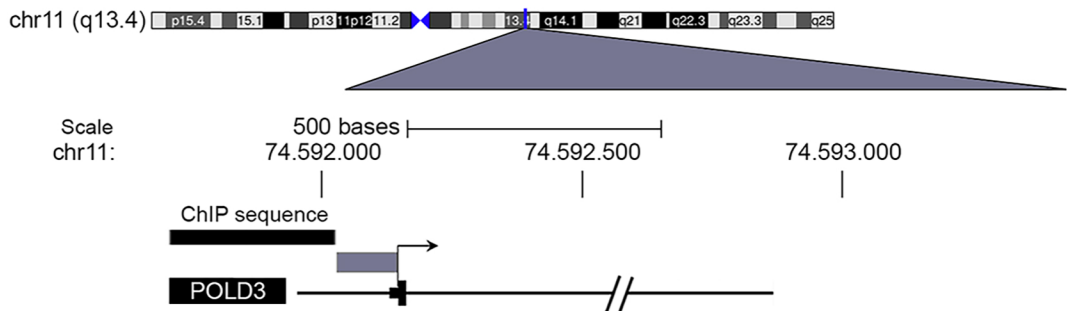

**b (i)**

| AC     | ID        | Score    | Loc. | Str. | Consensus Sequence | Signal Sequence    |
|--------|-----------|----------|------|------|--------------------|--------------------|
| M00239 | V\$T3R_01 | 0.751656 | 295  | (+)  | SNNTRAGGTCACGSNN   | AACACAGGTCAAAAAGC  |
| M00239 | V\$T3R_01 | 0.731970 | 367  | (+)  | SNNTRAGGTCACGSNN   | AGTTAAAATCAAGGGA   |
| M00239 | V\$T3R_01 | 0.750331 | 436  | (+)  | SNNTRAGGTCACGSNN   | GATTGAGGAAAATCCT   |
| M00239 | V\$T3R_01 | 0.770017 | 685  | (+)  | SNNTRAGGTCACGSNN   | AGCTGGGGTTACAGGC   |
| M00239 | V\$T3R_01 | 0.782889 | 779  | (-)  | SNNTRAGGTCACGSNN   | TCTCCTGACCTCATGA   |
| M00239 | V\$T3R_01 | 0.731024 | 801  | (-)  | SNNTRAGGTCACGSNN   | CGCCTTGGCCTCCAAA   |
| M00239 | V\$T3R_01 | 0.743328 | 1075 | (-)  | SNNTRAGGTCACGSNN   | ACTCCTGATCTCAGGT   |
| M00239 | V\$T3R_01 | 0.747113 | 1213 | (+)  | SNNTRAGGTCACGSNN   | AGATGAGTTGATGGCA   |
| M00239 | V\$T3R_01 | 0.751656 | 1569 | (-)  | SNNTRAGGTCACGSNN   | ACTTTTGTGATCTGATTC |
| M00239 | V\$T3R_01 | 0.738974 | 1605 | (+)  | SNNTRAGGTCACGSNN   | CAGTGAGGTGCCGTGA   |
| M00239 | V\$T3R_01 | 0.819231 | 1613 | (-)  | SNNTRAGGTCACGSNN   | TGCCGTGATCTTTATG   |

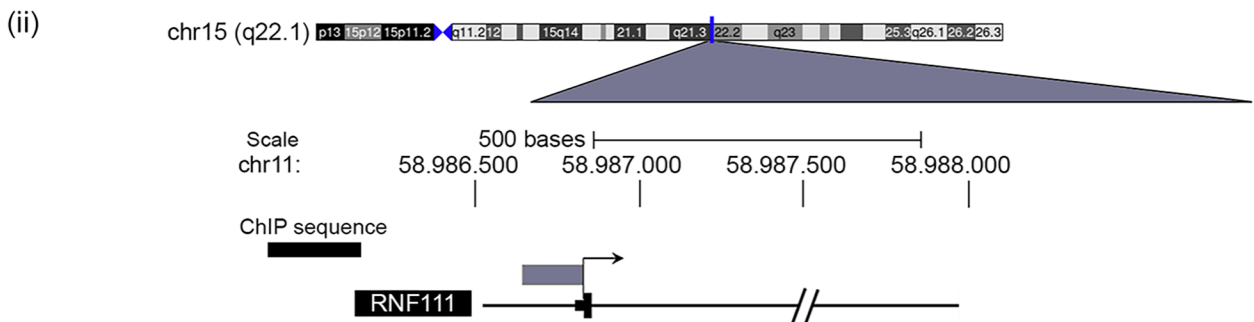

**Supplementary Fig. 13 | Positions of Thyroid Hormone Receptor binding sites within *POLD3* and *RNF111* promoter genes.** **a, (i)** Consensus sequence analysis of the 15 different putative consensus motifs for Thyroid Hormone Receptor (ID V\$T3R\_01, AC M00239) within the *POLD3* promoter region. **(ii)** The mammalian structure and position from Genome Browser are indicated for the *POLD3* promoter. The black box represents the sequence analyzed by ChIP. **b, (i)** Consensus sequence analysis of the 11 different putative consensus motifs for Thyroid Hormone Receptor (ID V\$T3R\_01, AC M00239) within the *RNF111* promoter region. **(ii)** The mammalian structure and position from Genome Browser are indicated for the *RNF111* promoter. The black box represents the sequence analyzed by ChIP.



**a (i)**

| AC     | ID        | Score    | Loc. | Str. | Consensus Sequence | Signal Sequence  |
|--------|-----------|----------|------|------|--------------------|------------------|
| M00239 | V\$T3R_01 | 0.743517 | 206  | (-)  | SNNTRAGGTCACGSNN   | ATCCATCACCTTTTTT |
| M00239 | V\$T3R_01 | 0.747113 | 383  | (-)  | SNNTRAGGTCACGSNN   | AGTGGTGCCATCACGG |
| M00239 | V\$T3R_01 | 0.837403 | 407  | (-)  | SNNTRAGGTCACGSNN   | AGCCTTAACCTCATGG |
| M00239 | V\$T3R_01 | 0.758471 | 409  | (+)  | SNNTRAGGTCACGSNN   | CCTTAACCTCATGGAC |
| M00239 | V\$T3R_01 | 0.813742 | 425  | (-)  | SNNTRAGGTCACGSNN   | TCCAGTGATCTTCCTG |
| M00239 | V\$T3R_01 | 0.763013 | 540  | (-)  | SNNTRAGGTCACGSNN   | ACTCCTGAGCTCAAGC |
| M00239 | V\$T3R_01 | 0.773992 | 542  | (+)  | SNNTRAGGTCACGSNN   | TCCTGAGCTCAAGCGA |
| M00239 | V\$T3R_01 | 0.792921 | 783  | (+)  | SNNTRAGGTCACGSNN   | GAGAGGGGTCAATCTT |
| M00239 | V\$T3R_01 | 0.774938 | 1104 | (+)  | SNNTRAGGTCACGSNN   | GAAGAAGTTCAAGATG |
| M00239 | V\$T3R_01 | 0.849707 | 1208 | (-)  | SNNTRAGGTCACGSNN   | GACAGTGACATTAGTT |
| M00239 | V\$T3R_01 | 0.752981 | 1377 | (+)  | SNNTRAGGTCACGSNN   | GACTGAGGCTAAGCC  |
| M00239 | V\$T3R_01 | 0.760931 | 1616 | (-)  | SNNTRAGGTCACGSNN   | AGGAGAGAGCTCAGGC |
| M00239 | V\$T3R_01 | 0.741813 | 1618 | (+)  | SNNTRAGGTCACGSNN   | GAGAGAGCTCAGGCC  |
| M00239 | V\$T3R_01 | 0.731592 | 1831 | (-)  | SNNTRAGGTCACGSNN   | GCTGATGACCGCATAA |
| M00239 | V\$T3R_01 | 0.738785 | 1889 | (+)  | SNNTRAGGTCACGSNN   | CAATCAGGTCTGAGGA |
| M00239 | V\$T3R_01 | 0.740488 | 1896 | (+)  | SNNTRAGGTCACGSNN   | GTCTGAGGAGAACCCT |
| M00239 | V\$T3R_01 | 0.805414 | 1912 | (+)  | SNNTRAGGTCACGSNN   | CTTTGGGCTCACAGAA |

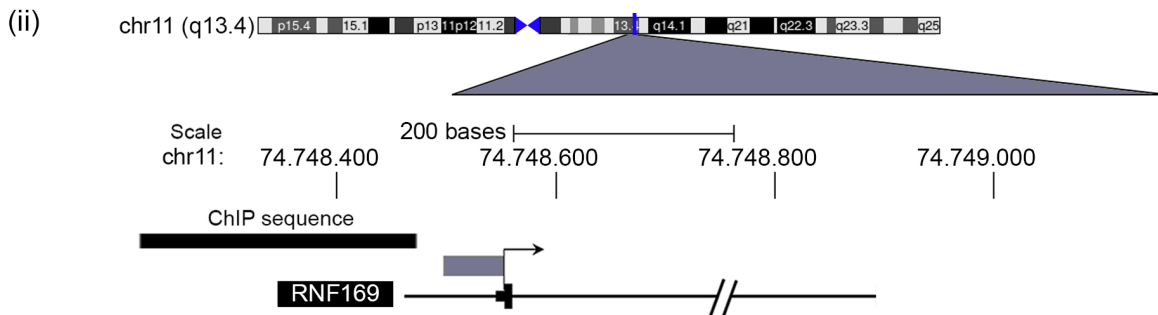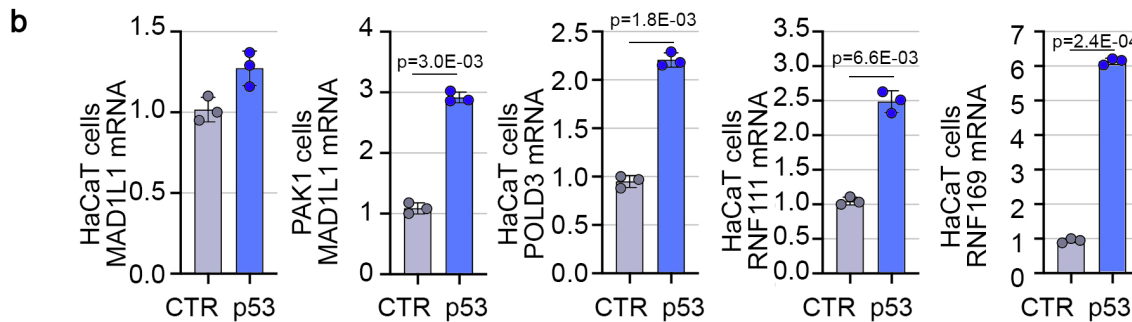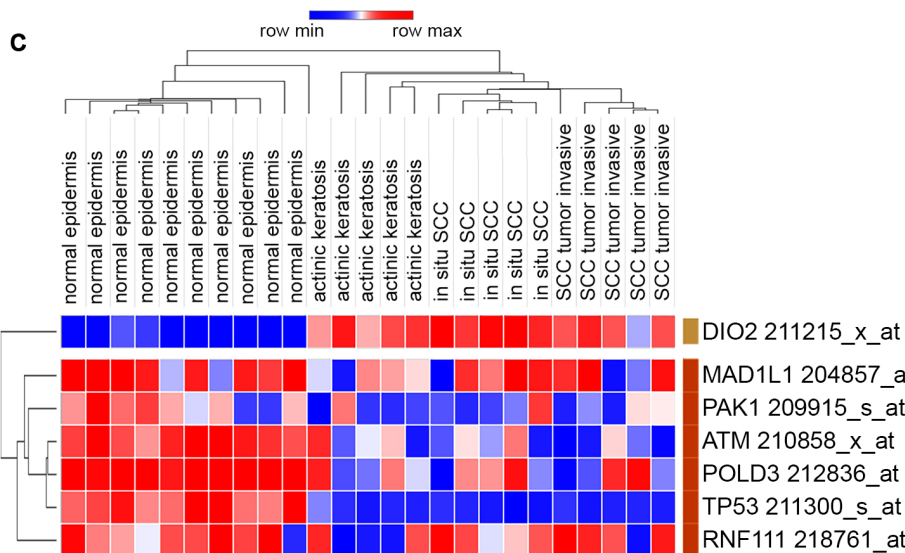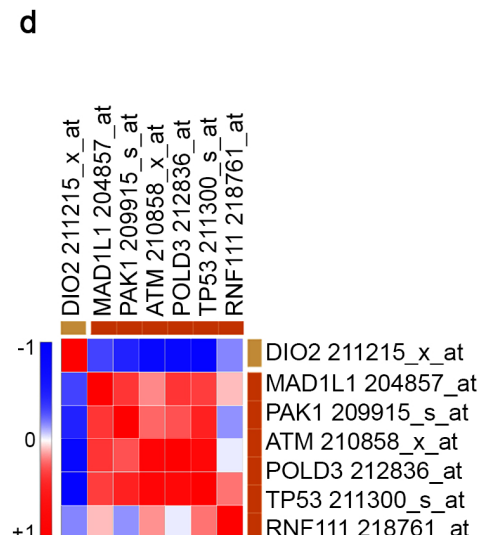

**Supplementary Fig. 14 | Positions of Thyroid Hormone Receptor binding sites within *RNF169* promoter gene.** **a, (i)** Consensus sequence analysis of the 17 different putative consensus motifs for Thyroid Hormone Receptor (ID V\$T3R\_01, AC M00239) within the *RNF169* promoter region. **(ii)** The mammalian structure and position from Genome Browser are indicated for the *RNF169* promoter. The black box represents the sequence analyzed by ChIP. **b**, *MAD1L1*, *PAK1*, *POLD3*, *RNF111* and *RNF169* mRNA expression was measured by Real-Time PCR in HaCaT cells transiently transfected with a p53-expressing vector or a control empty plasmid (CTR). All the results are shown

as means  $\pm$  SD from at least 3 separate experiments. p-values were determined by two-tailed Student's t-test. **c**, Expression heatmap of *DIO2*, *MAD1L1*, *PAK1*, *ATM*, *POLD3*, *TP53* and *RNF111* genes, differentially expressed across normal epidermis, actinic keratosis, in situ and invasive SCC samples from GSE42677. **d**, Pearson's correlation analysis was performed for the same dataset samples as in **a**, by using Morpheus heatmap visualization software (Pearson's correlation coefficient,  $\rho$ :  $\rho_{DIO2} = -0.98$ ;  $\rho_{MAD1L1} = 0.51$ ;  $\rho_{PAK1} = 0.54$ ;  $\rho_{ATM} = 0.73$ ;  $\rho_{POLD3} = 0.80$ ;  $\rho_{TP53} = 0.93$ ;  $\rho_{RNF111} = 0.23$ ). Source data are provided as a Source Data file.

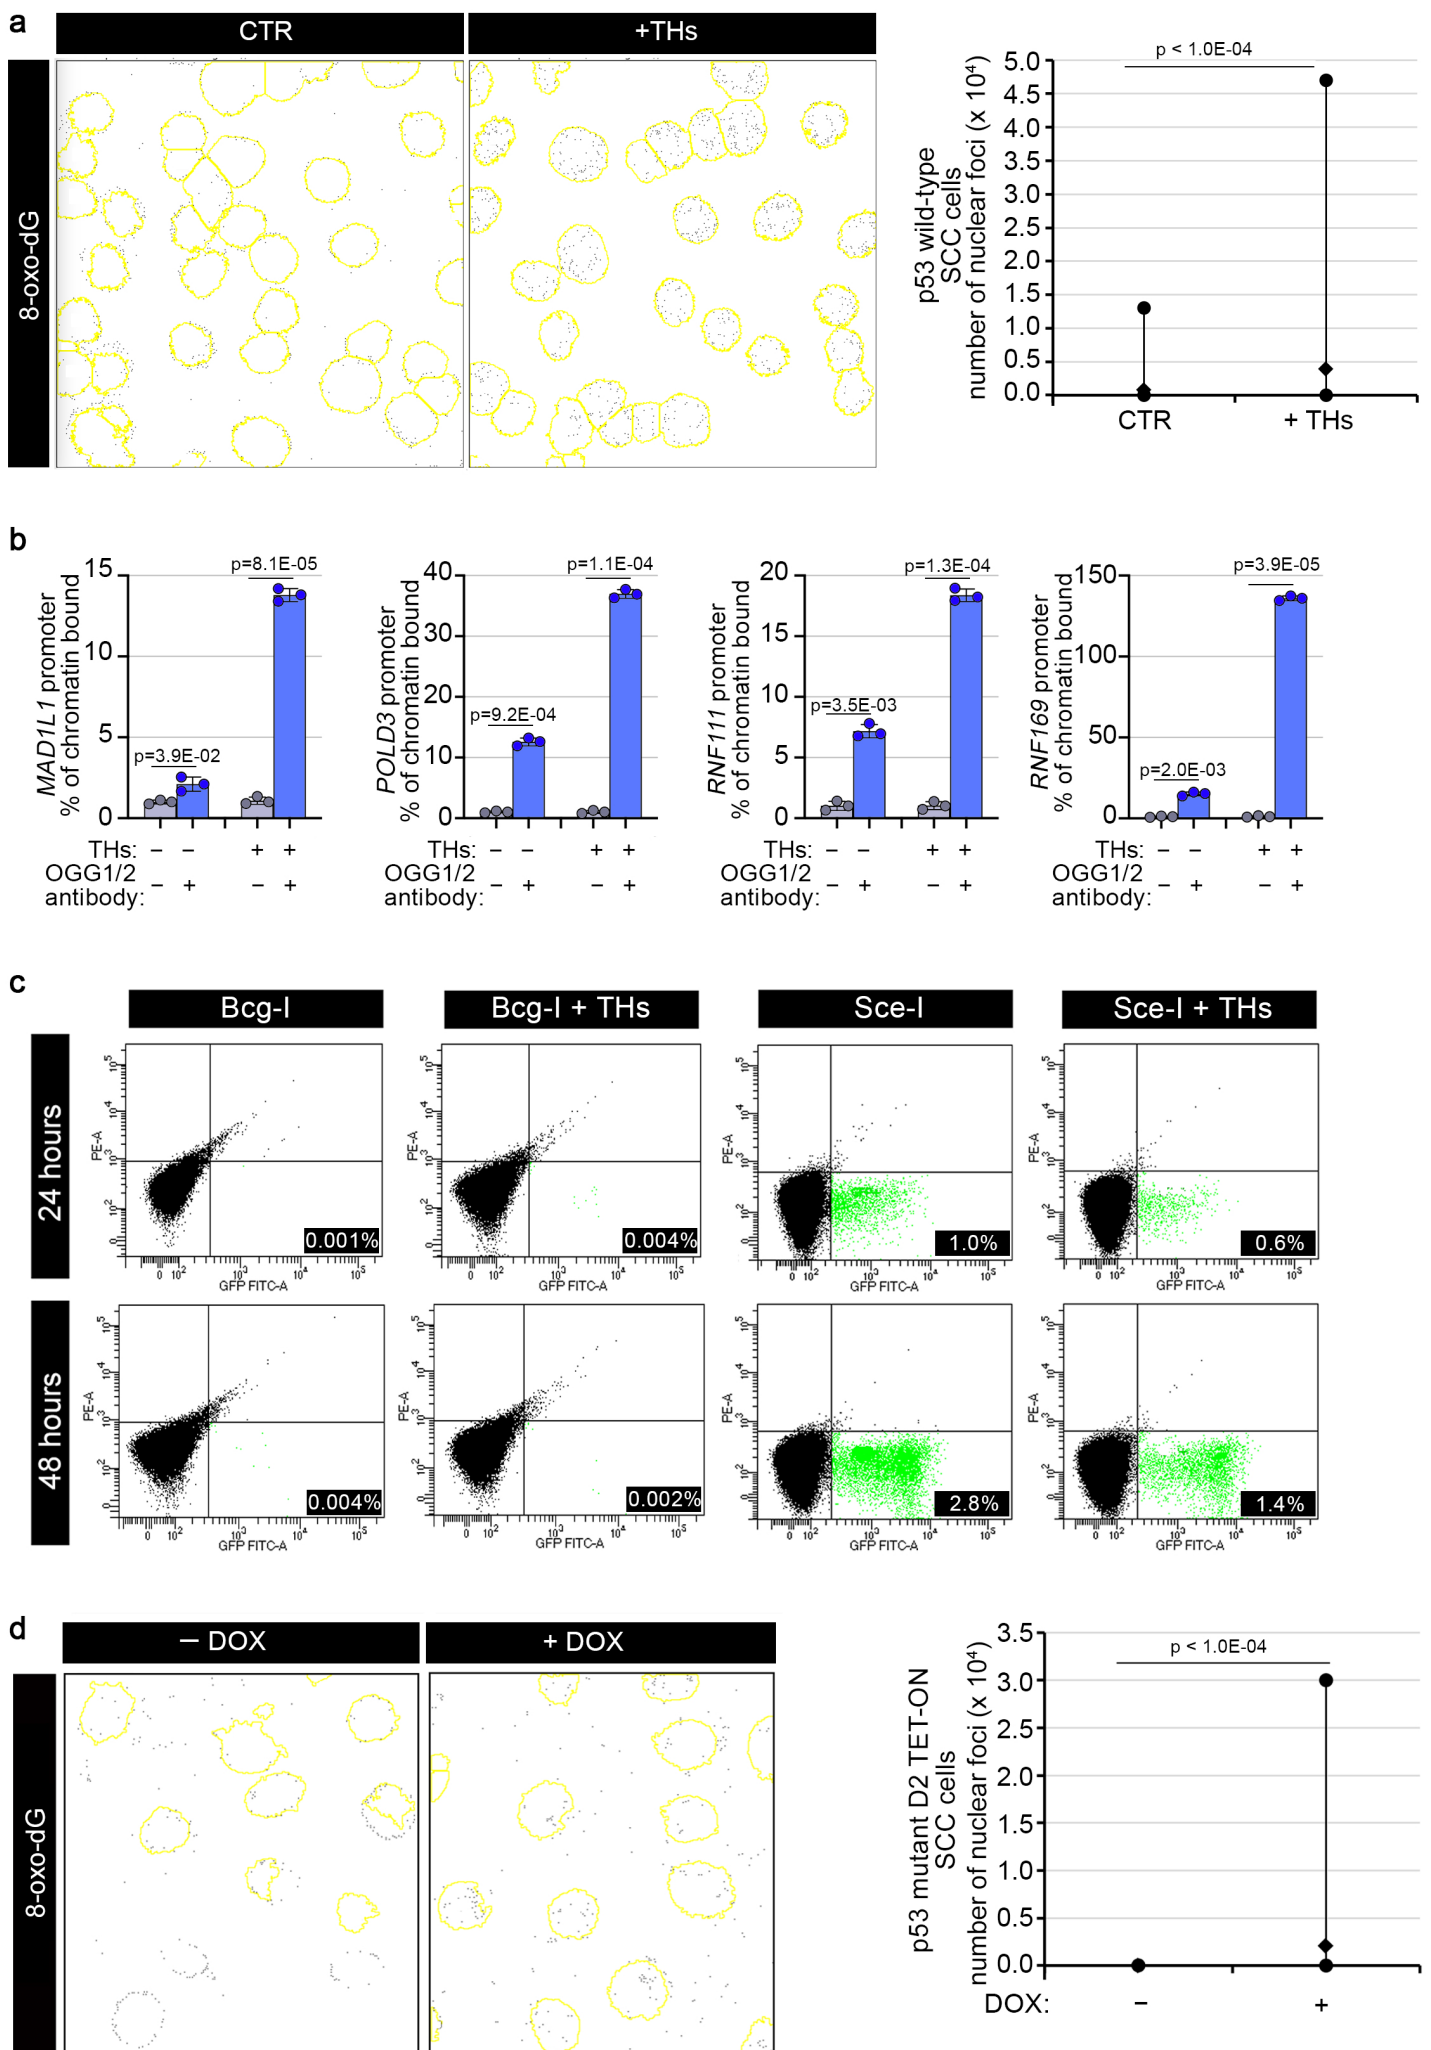

**Supplementary Fig. 15 | THs treatment induce a significant accumulation of nuclear 8-oxo-dG signal and affect DNA repair mechanisms. a**, Quantification analysis of the 8-oxo-dG/DAPI co-localization signal in SCC011 cells treated or not with THs (T3, 30.0 nM/24 hours + T4, 30.0 nM/24



hours). p-value was determined by Mann–Whitney test. **b**, ChIP of the 8-oxoguanine DNA glycosylase 1, OGG1/2, binding to the *MAD1L1*, *POLD3*, *RNF111* and *RNF169* promoter was performed in SCC011 cells treated or not with THs (T3, 30.0 nM/24 hours + T4, 30.0 nM/24 hours). Graph shows the Real-Time PCR results with % chromatin bound as indicated. All the results are shown as means  $\pm$  SD from at least 3 separate experiments. p-values were determined by two-tailed Student's t-test. **c**, Cytofluorimetric analysis of HeLa-DRGFP cells, treated or not with THs (T3, 30.0 nM + T4, 30.0 nM) for 24 and 48 hours, undergoing repair by homologous recombination. The panels show the distribution of GFP<sup>+</sup> cells after homologous recombination. **d**, Quantification analysis of the 8-oxo-dG/DAPI co-localization signal in SCC13 Tet-ON-D2 cells treated or not with doxycycline (DOX, 2  $\mu$ g/mL) for 24 hours. p-value was determined by Mann–Whitney test. Source data are provided as a Source Data file.

**a**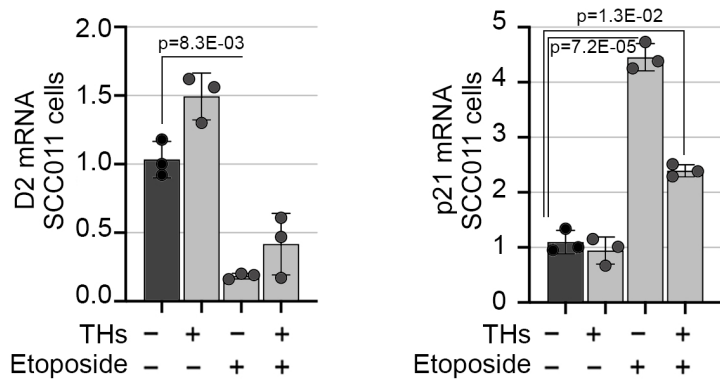**b**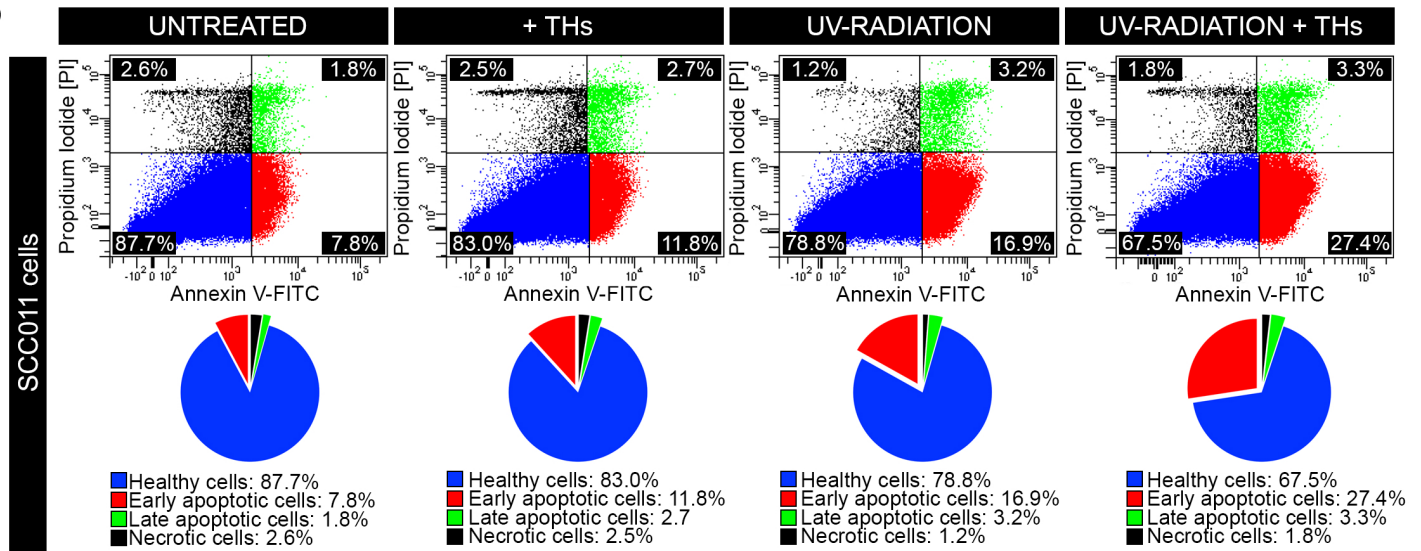

**Supplementary Fig. 16 | Enhancement of TH signaling increases DNA damage.** **a**, mRNA expression of *D2* and *p21* was measured by Real-Time PCR in SCC011, treated or not with THs (T3, 30.0 nM + T4, 30.0 nM) for 24 hours, alone and in combination with etoposide (50.0 μM/30 minutes) (n = 3 independent experiments). All the results are shown as means ± SD from at least 3 separate experiments. p-values were determined by two-tailed Student's t-test. **b**, Flow cytometric analysis for monitoring the effect of TH-induced apoptosis in SCC011 cells, exposed or not to UV-C radiation. Pie charts represent percentages of Viable (V), Early (E) and Late (L) apoptotic, and Necrotic (N) cells measured by Annexin V-FITC/PI costaining. Graphs represent an average of 3 separate experiments. Source data are provided as a Source Data file.

Figure 7a

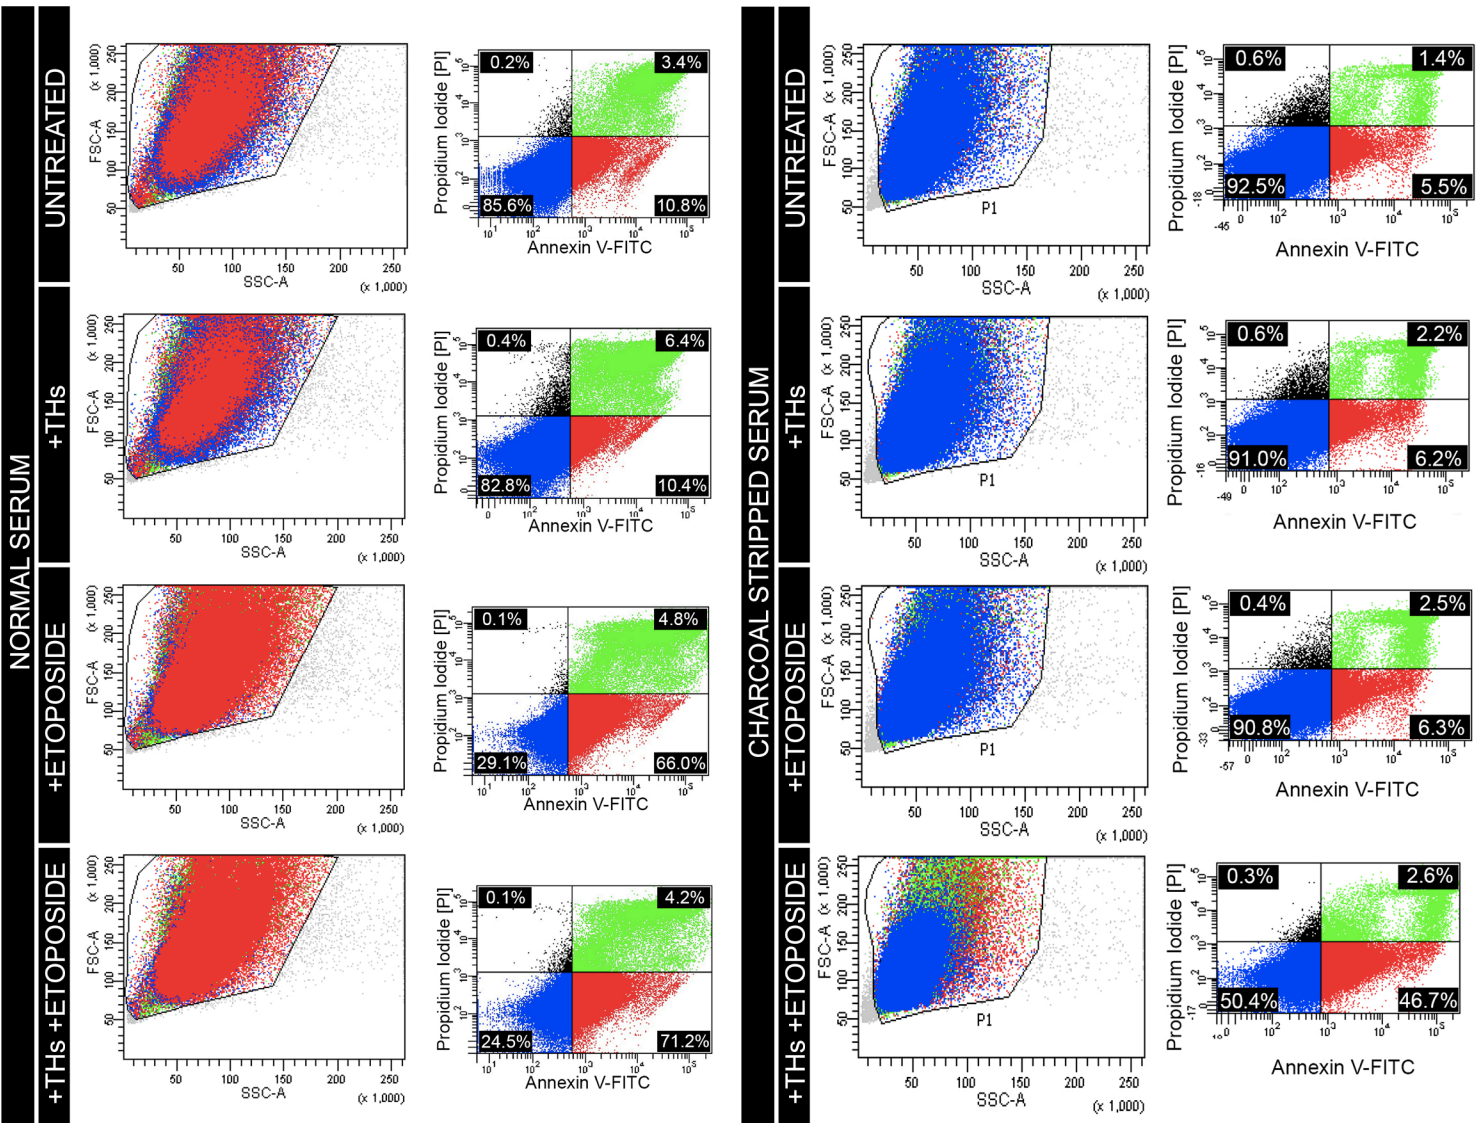

Figure 7c

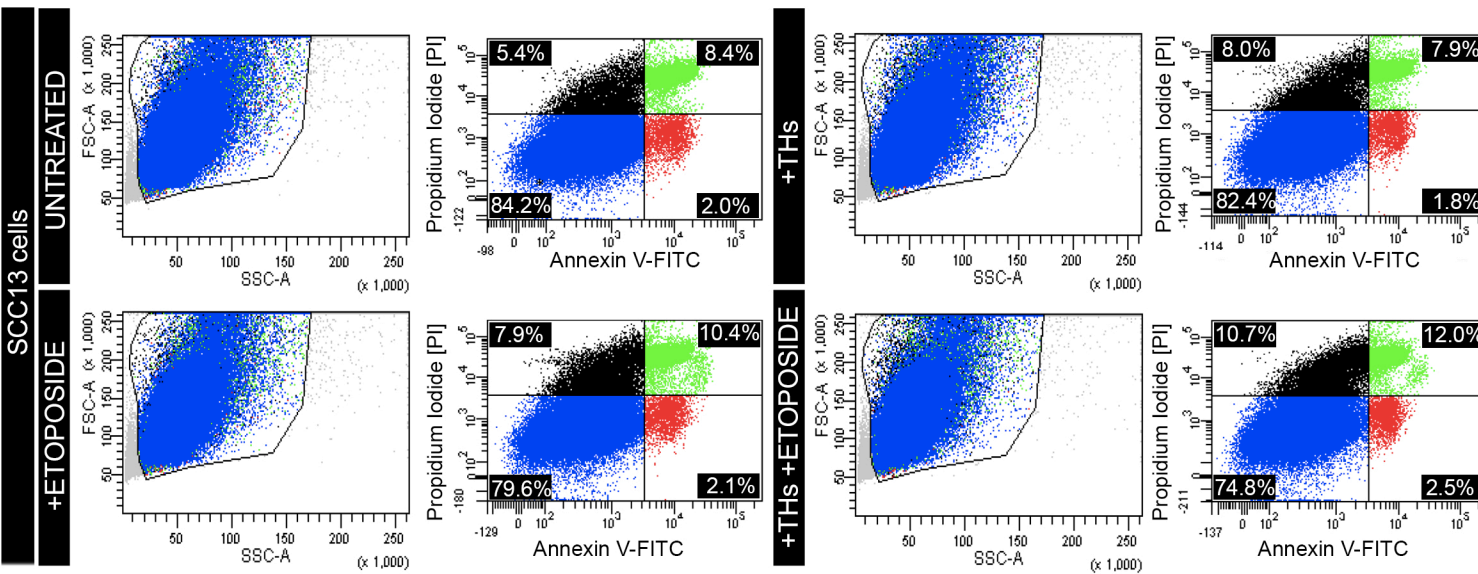

Supplementary Fig. 17 strategies.

| Graphical representation for all FACS sequential gating/sorting



Supplementary Figure 15c

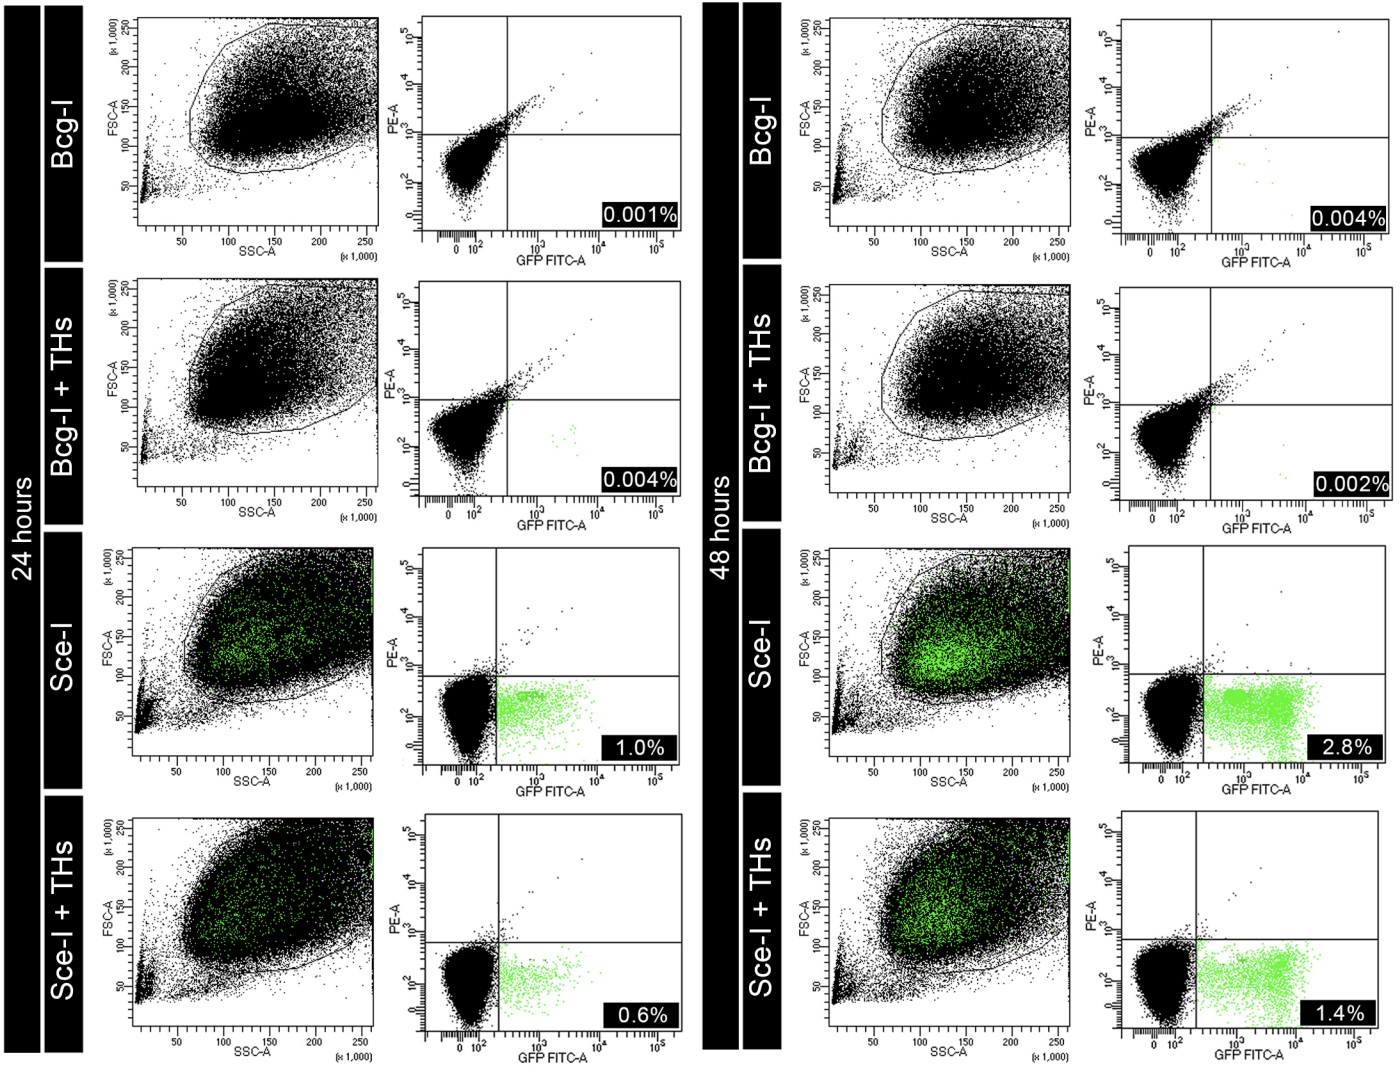

Supplementary Figure 16b

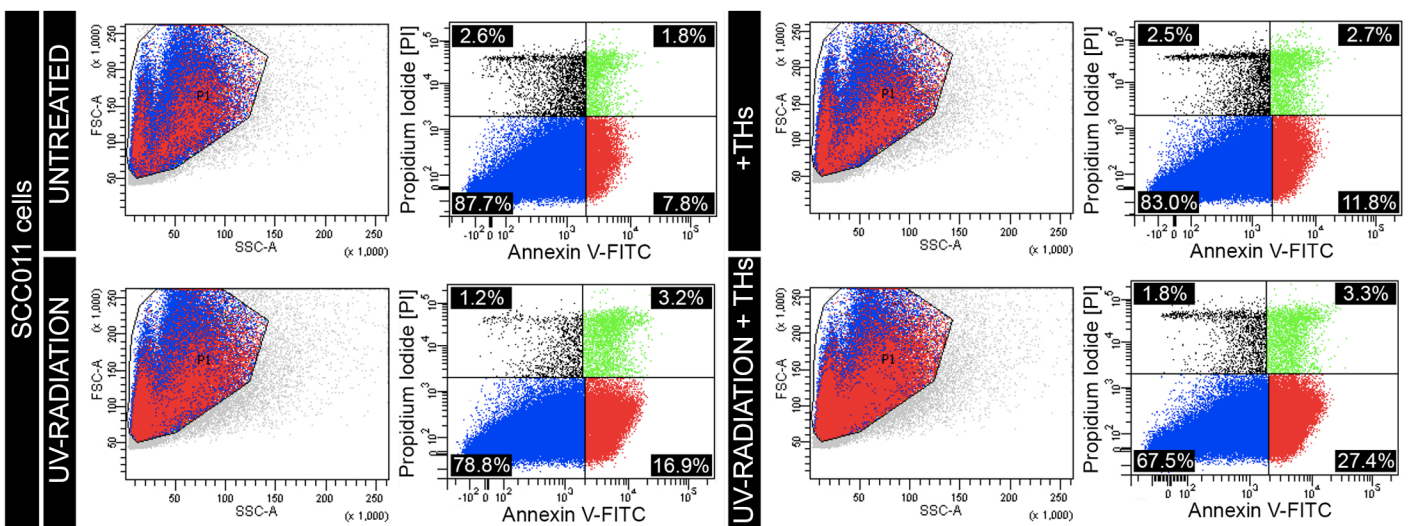

Supplementary Fig. 18 | Graphical representation for all FACS sequential gating/sorting strategies.

Figure 2h

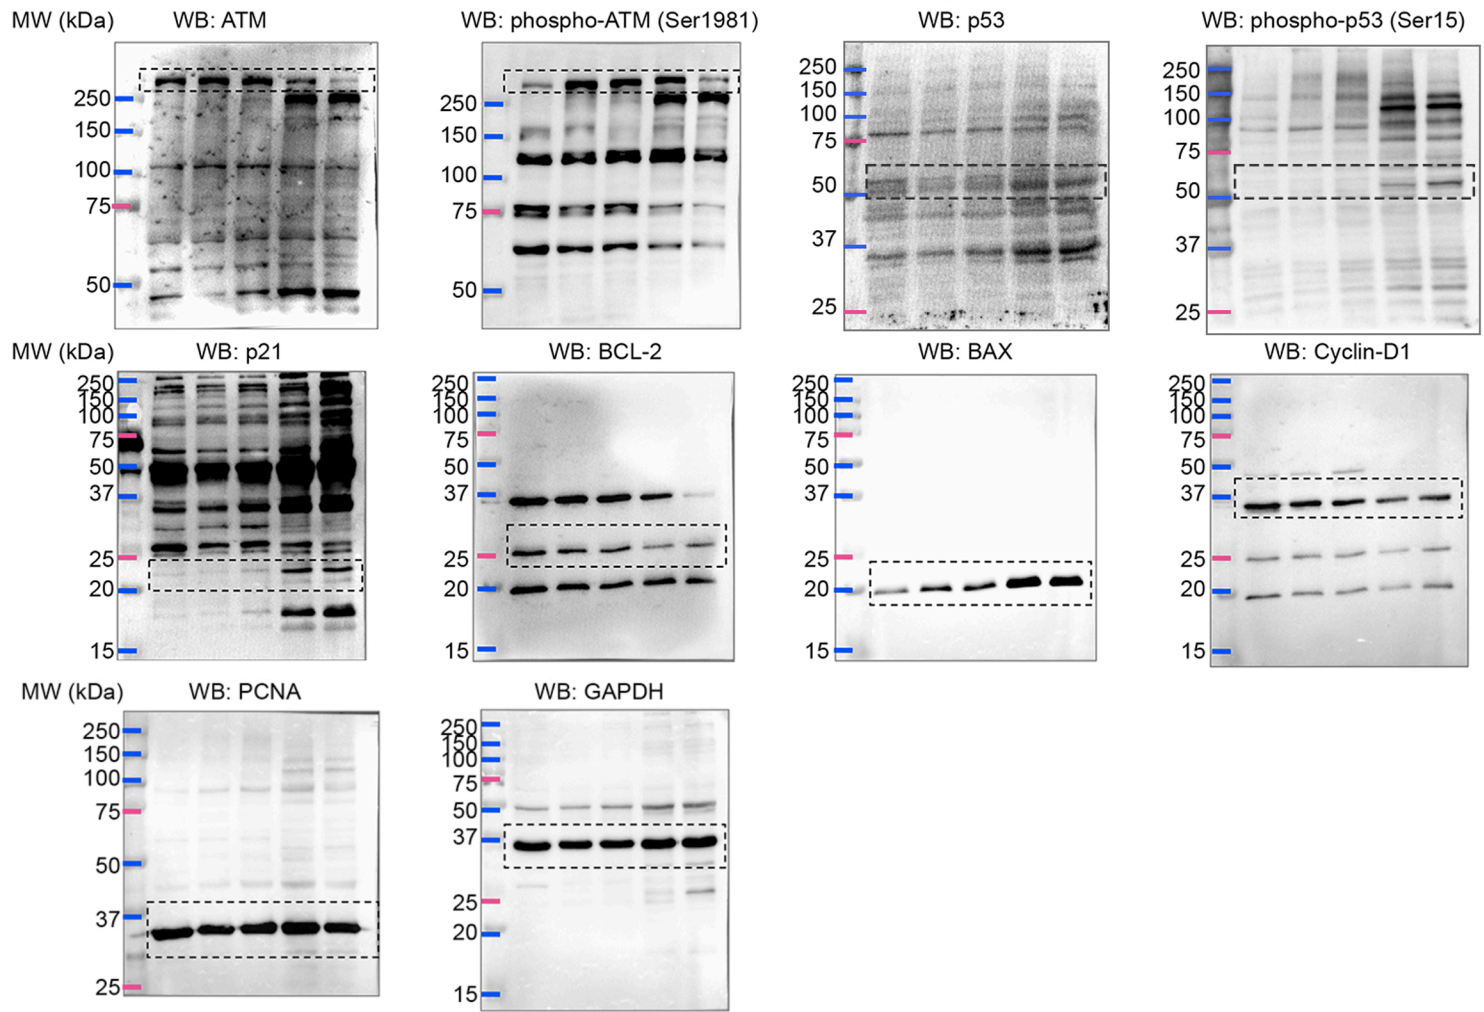

Figure 2k

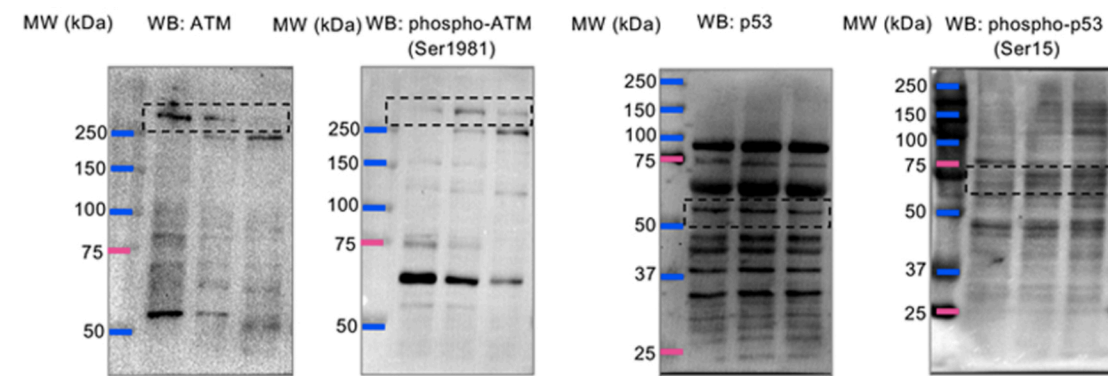

Figure 2l

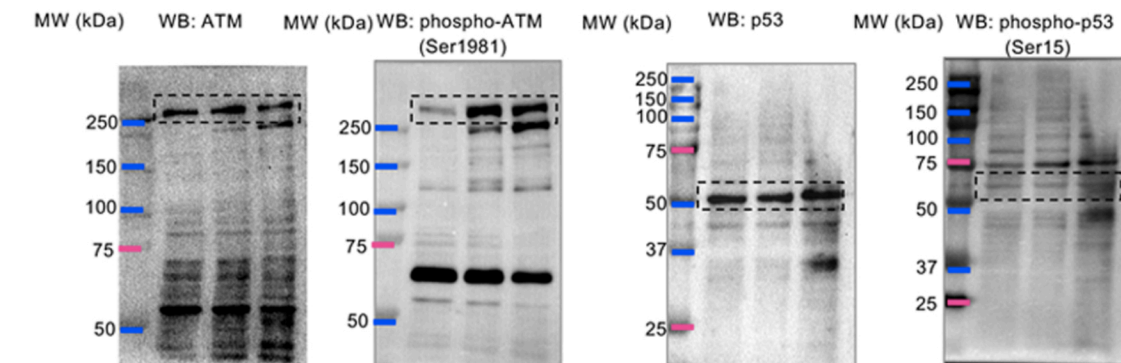



Figure 3k

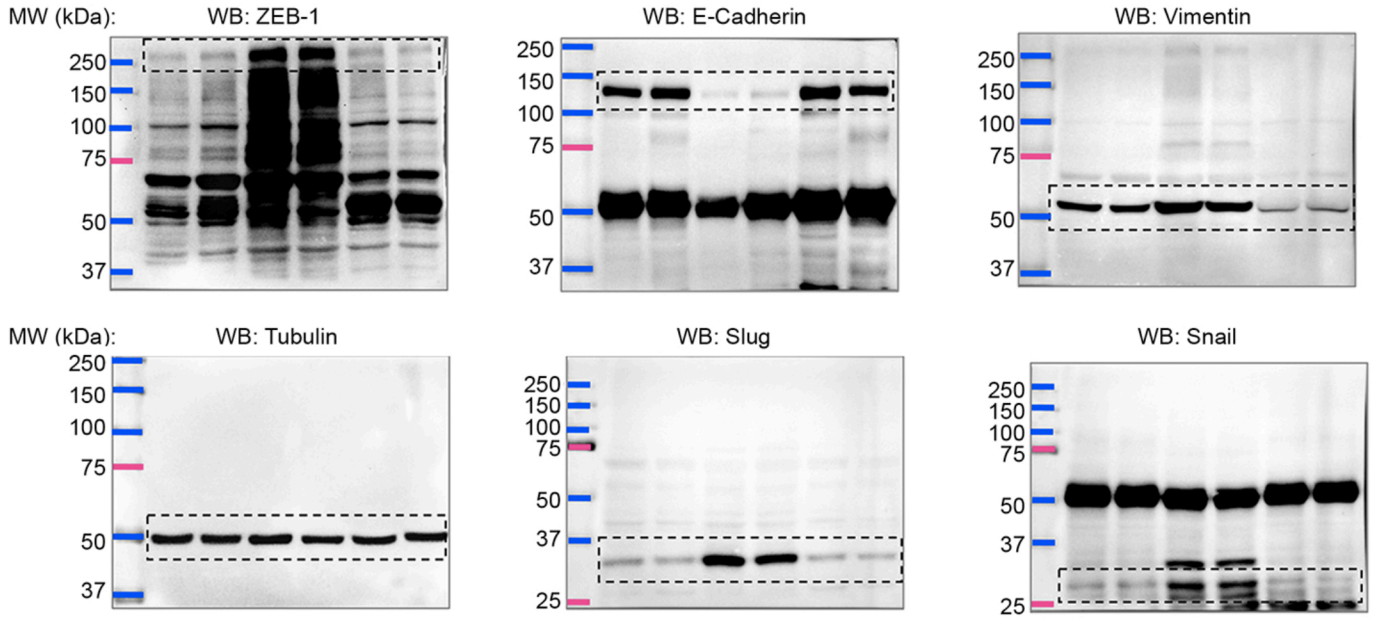

Supplementary Figure 4

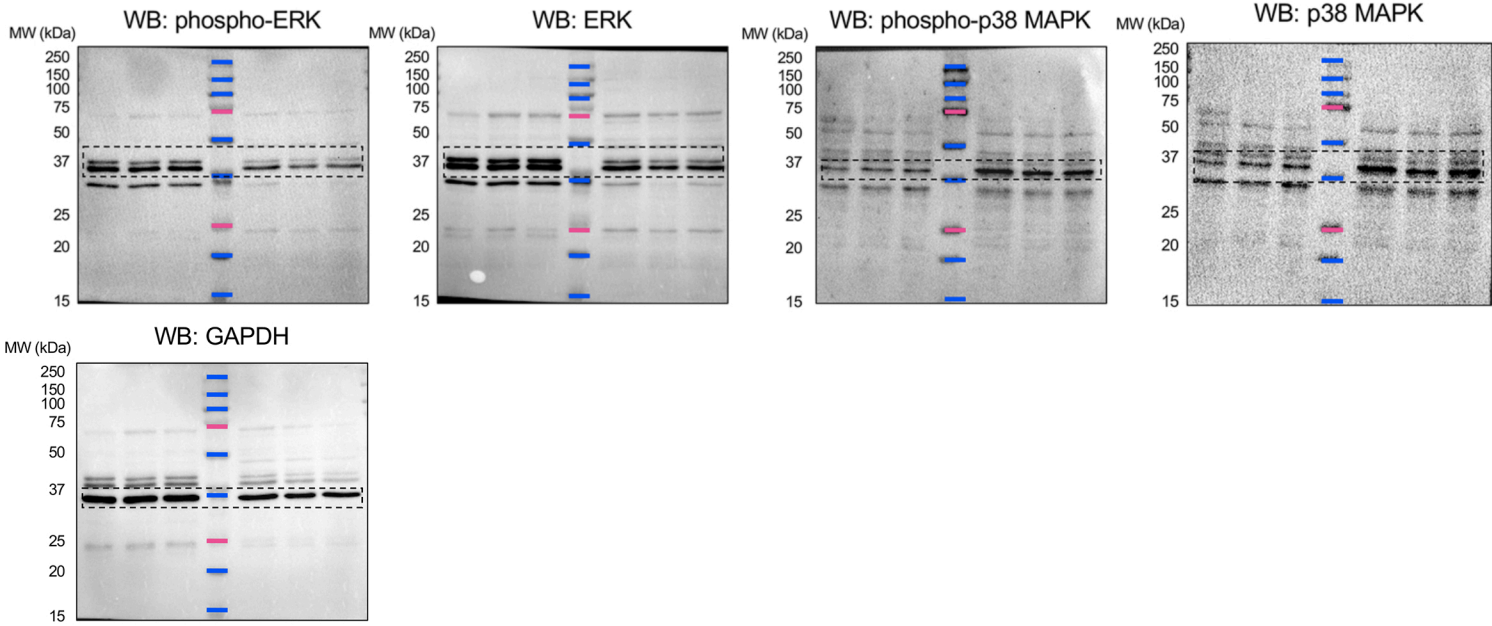

Supplement: 41467_2023_36755_MOESM1_ESM.pdf [file 41467_2023_36755_MOESM1_ESM.pdf]
