# Supplementary material for: Loss of p53 activates thyroid hormone via type 2 deiodinase and enhances DNA damage
Source: PubMed Central journal article supplement (PMC9985592; doi:10.1038/s41467-023-36755-y), 2023-03-04
Supplement: 41467_2023_36755_MOESM2_ESM.pdf [file 41467_2023_36755_MOESM2_ESM.pdf]

## Inventory of Supporting Information

**File Name:** Supplementary Data 1

**Description:** Supplementary Data 1 | List of the 111 Differentially Expressed Genes (DEGs) identified from RNA-seq data analysis between p53KO<sup>+/-</sup>;D2KO and p53KO<sup>+/-</sup>;D2WT mice. Genes are listed by Fold Change (FC) order.

**File Name:** Supplementary Data 2

**Description:** Supplementary Data 2 | Primers used for Real-Time PCR, ChIP and Dio2-depletion analysis in mouse models.

**File Name:** Supplementary Data 3

**Description:** Supplementary Data 3 | List of antibodies indicating the dilution used for Western Blot (WB), Immunofluorescence (IF) and Chromatin Immuno-Precipitation (ChIP) analysis.
